# Supplementary material
Source: PubMed Central journal article supplement (PMC3156435)
Supplement: NIHMS313108-supplement-6.pdf [file NIHMS313108-supplement-6.pdf]

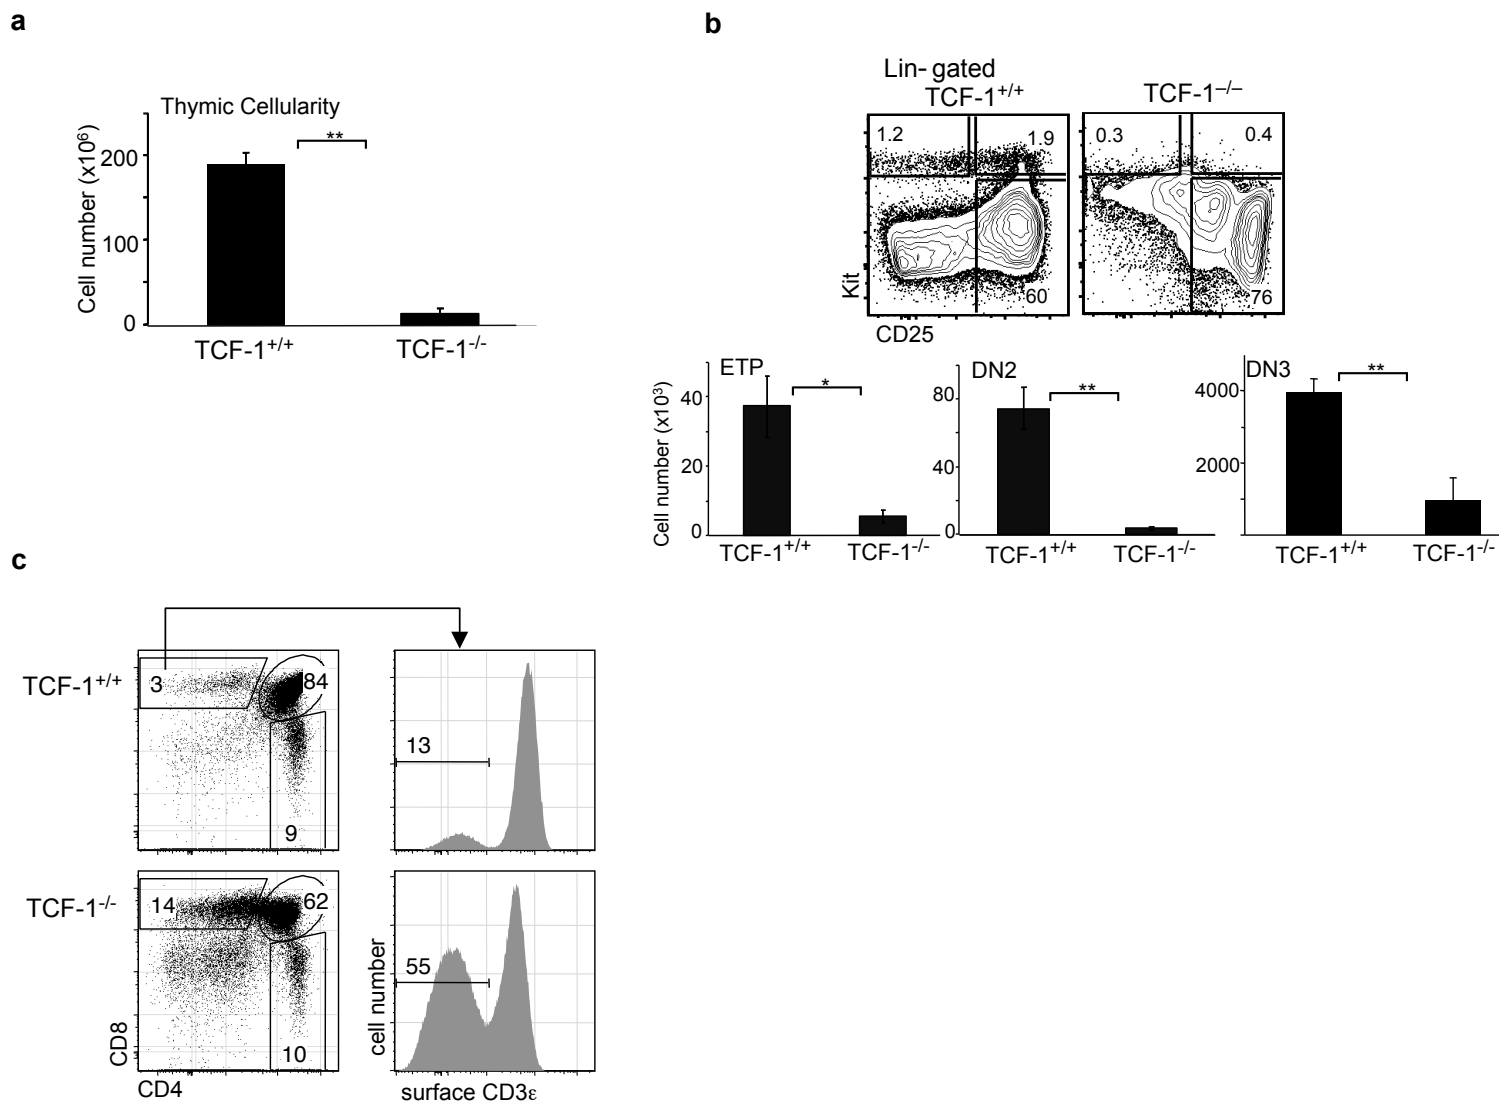

**Supplementary Figure 1. Thymic development is aberrant in TCF-1 deficient mice.**

**a**, Total thymic cellularity is shown comparing wt littermate control mice to TCF-1<sup>-/-</sup> mice. Mice were 4-6 weeks of age. **b**, Representative flow plots and absolute numbers of ETPs (Lin<sup>-</sup>Kit<sup>+</sup>CD25<sup>-</sup>), DN2 cells (Lin<sup>-</sup>Kit<sup>+</sup>CD25<sup>+</sup>) and DN3 cells (Lin<sup>-</sup>Kit<sup>-</sup>CD25<sup>+</sup>) are shown. Results represent 4 or more mice/group, +/- s.e.m. \* $p < 0.05$ , \*\* $p < 0.005$  **c**, TCF-1<sup>-/-</sup> thymocytes exhibit a partial block at the immature single positive (ISP) CD8<sup>+</sup>CD4<sup>-</sup>CD3 $\epsilon$ <sup>+</sup> stage of development.

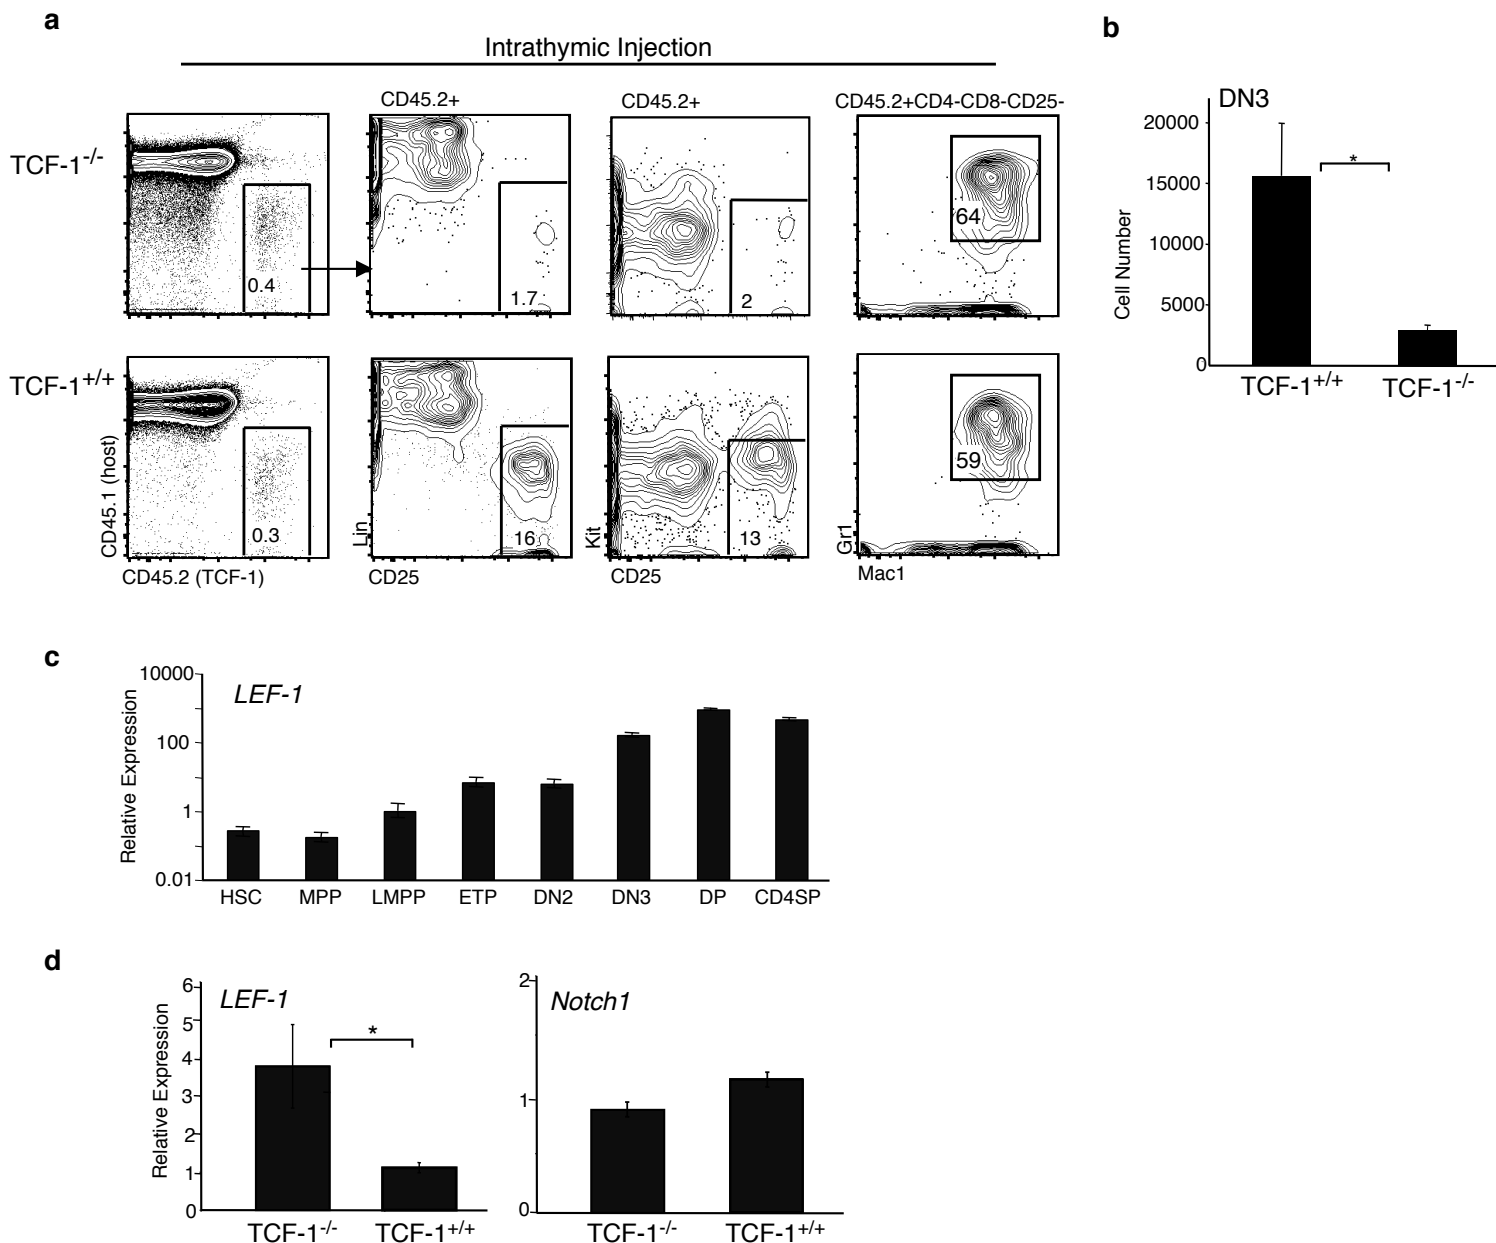

### Supplementary Figure 2. In vivo development of TCF-1 deficient progenitors.

**a**, TCF-1<sup>+/+</sup> and TCF-1<sup>-/-</sup> Lin-Sca-1<sup>+</sup>Kit<sup>+</sup> (LSK) cells were isolated and intrathymically injected into sublethally irradiated recipients and analyzed 10 days later. Shown is a representative example of the thymus of mice that received TCF-1<sup>+/+</sup> or TCF-1<sup>-/-</sup> progenitors, analyzed for DN3 (Lin-Kit<sup>+</sup>CD25<sup>+</sup>) and myeloid (Mac1<sup>+</sup>Gr1<sup>+</sup>) cells. **b**, Absolute cell number of DN3 cells, result represents 3-4 mice per group  $\pm$  s.e.m., \* $p < 0.05$ . **c**, Relative expression of TCF-1 related family member, LEF-1 throughout T cell development. Results represent the relative gene expression compared to LMPP after normalizing to 18sRNA. Error bars are s.e.m. **d**, Relative gene expression of LEF-1 and Notch1 in TCF-1<sup>+/+</sup> and TCF-1<sup>-/-</sup> DN3 cells. Results represent averages of 2-4 mice per group, normalized to TCF-1<sup>+/+</sup> DN3 cells. Error bars are s.e.m., \* $p < 0.05$ .

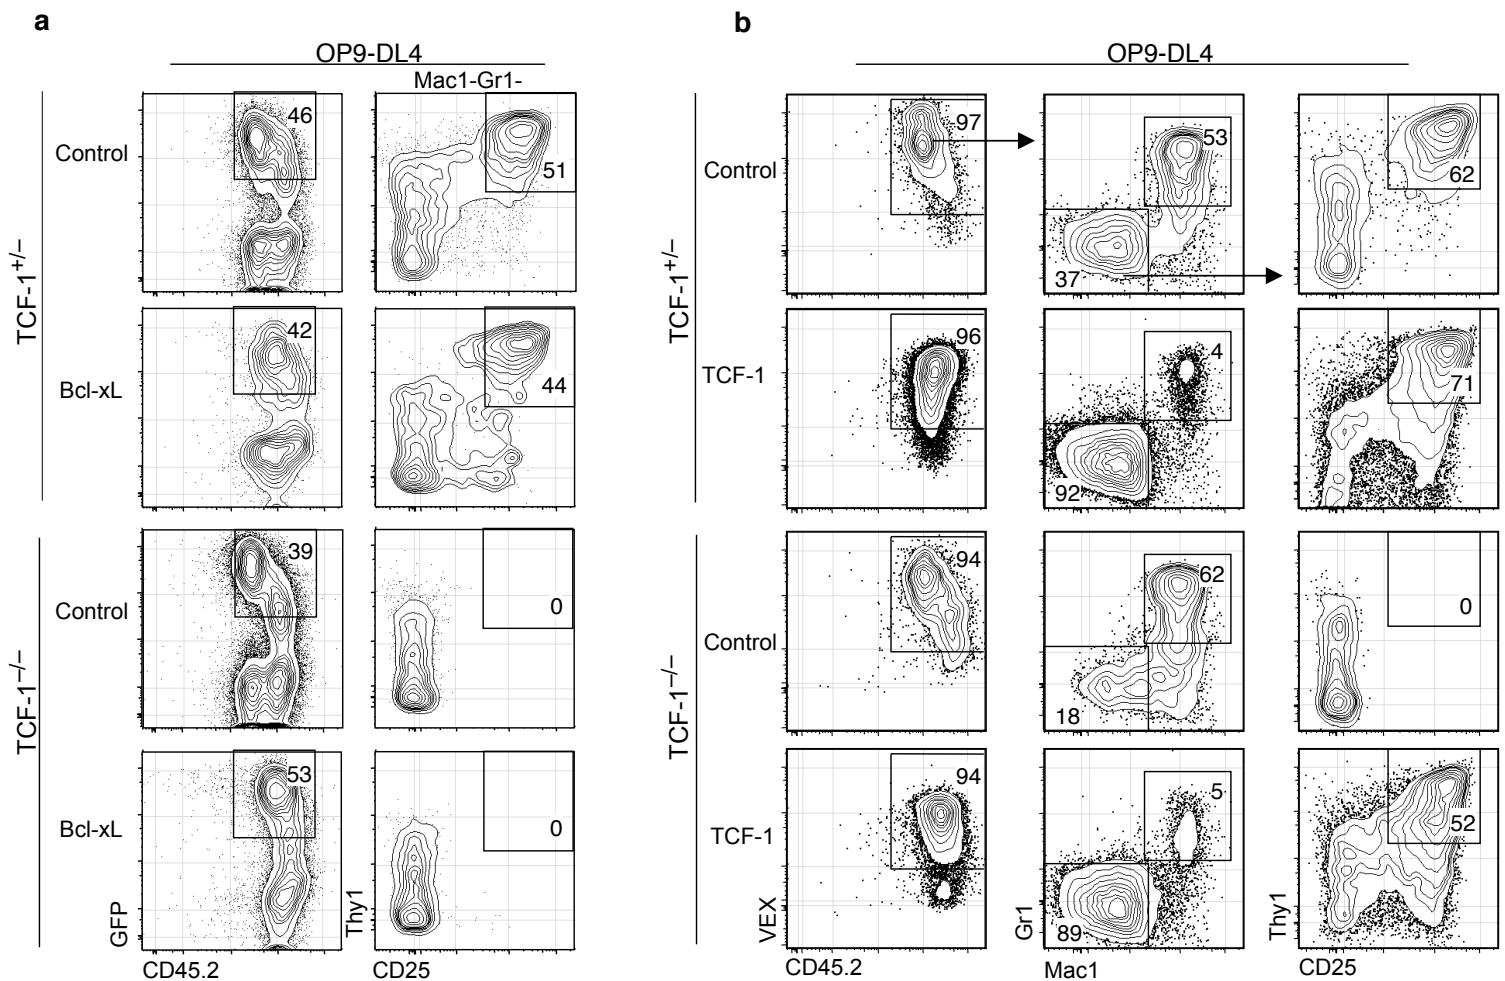

**Supplementary Figure 3. TCF-1 but not Bcl-xL restores T cell development from TCF-1<sup>-/-</sup> progenitors in vitro.**

**a**, LSK progenitors from TCF-1<sup>-/-</sup> or TCF-1<sup>+/-</sup> mice were transduced with MCSV-Bcl-xL (GFP) or empty vector MCSV-GFP (MigR1) virus. Cells were seeded on OP9-DL4 in equal cell number. In this experiment, transduced cells were not isolated by a second round of cell sorting. Bcl-xL-expressing TCF-1<sup>-/-</sup> progenitors failed to undertake T-lineage development, shown on day 10. Plots at right are gated to be Mac1-negative and Gr1-negative. **b**, LSK progenitors were isolated from TCF-1<sup>-/-</sup> or TCF-1<sup>+/-</sup> mice, transduced with MCSV-VEX-control virus or MSCV-TCF-1-VEX. Transduced cells were isolated by a second round of cell sorting, and then seeded onto OP9-DL4 for 10 days to assess T cell development. Shown is the gating strategy whereby first GFP<sup>+</sup>CD45<sup>+</sup> hematopoietic cells are gated and myeloid lineage cells are excluded. T-lineage development is shown by Thy1 versus CD25 expression. Results were consistent at earlier and later time points. Data are representative of at least 3 independent experiments.

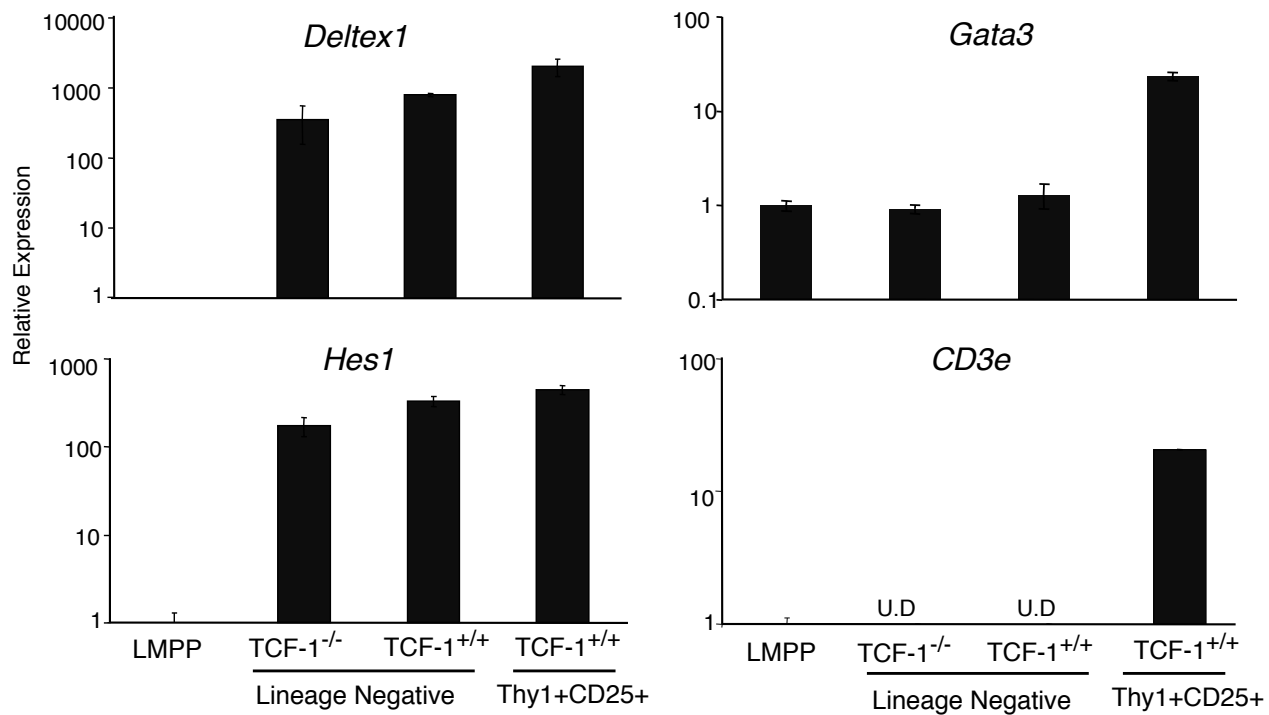

**Supplementary Figure 4. TCF-1<sup>-/-</sup> progenitors upregulate Notch1 gene targets but fail to upregulate T cell-specific genes.**

TCF-1<sup>-/-</sup> and TCF-1<sup>+/+</sup> LMPPs were isolated by cell sorting and seeded onto OP9-DL4 stroma. After five days of culture, lineage negative cells (Mac1<sup>-</sup>Gr1<sup>-</sup>CD25<sup>-</sup>) and Thy1<sup>+</sup>CD25<sup>+</sup> T lineage cells from TCF-1<sup>+/+</sup> cells were harvested for RNA and cDNA synthesis. QRT-PCR analysis was performed on Notch1 targets, *Deltex1* and *Hes1*, and T cell genes, *Gata3* and *CD3e*. Shown is the relative expression compared to LMPP after normalizing to 18sRNA. Error bars are s.e.m

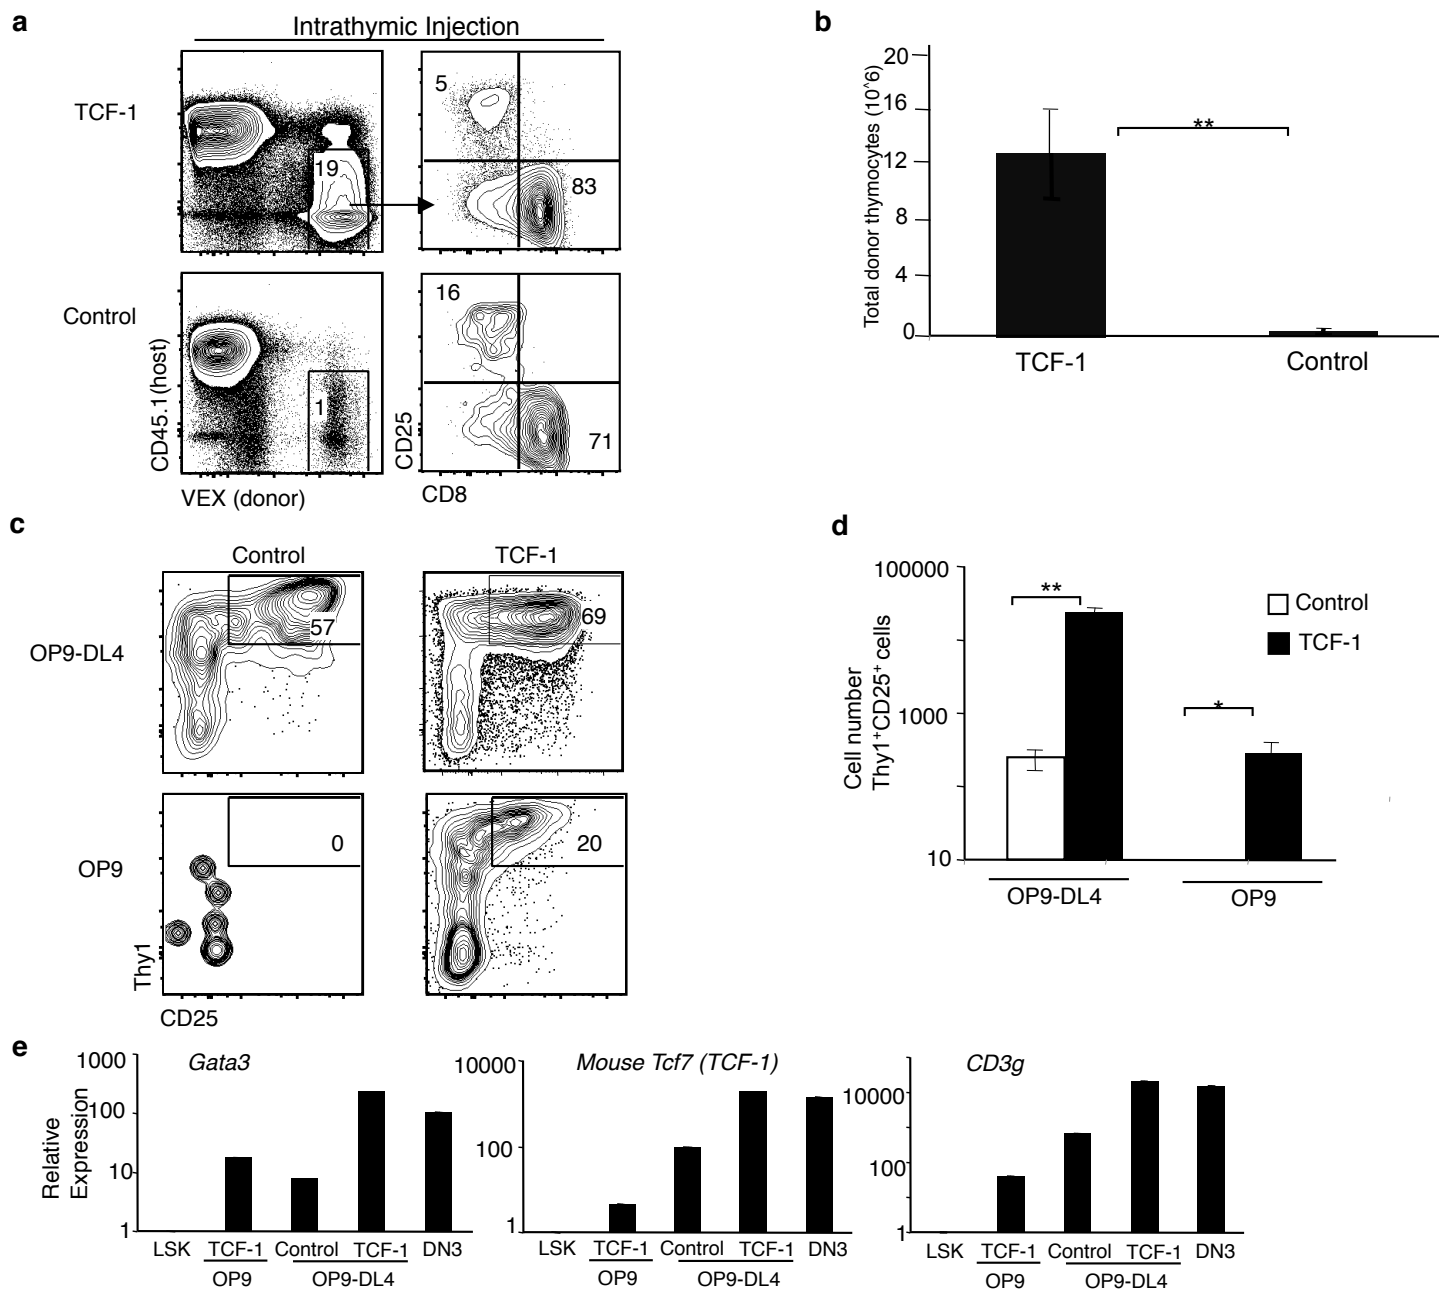

**Supplemental Figure 5. TCF-1 and Notch1 signals are additive in vivo and in vitro.**

**a**, TCF-1 or control expressing LSK progenitors were intrathymically injected into sublethally irradiated mice. Mice were analyzed on day 14 for thymic reconstitution (5 mice/group). **b**, Absolute numbers of donor derived thymocytes,  $**p < 0.005$ . **c**, Wt LSK progenitors were similarly isolated and transduced with MSCV-TCF-1-VEX or control vector. Transduced cells were isolated by cell sorting and equal numbers were seeded on OP9-DL4 and OP9. Development of Thy1<sup>+</sup>CD25<sup>+</sup> cells is shown on day 12. **d**, Relative cellularity of cultures from day 12 analysis (4 wells/group),  $*p < 0.05$ ,  $**p < 0.005$ . **e**, Expression of T lineage genes, from Thy1<sup>+</sup>CD25<sup>+</sup> cells isolated from day 10 cultures. DN3 thymocytes are shown on the right for comparison. Results are relative to LSK after normalizing to GAPDH. All error bars, means  $\pm$  s.e.m.

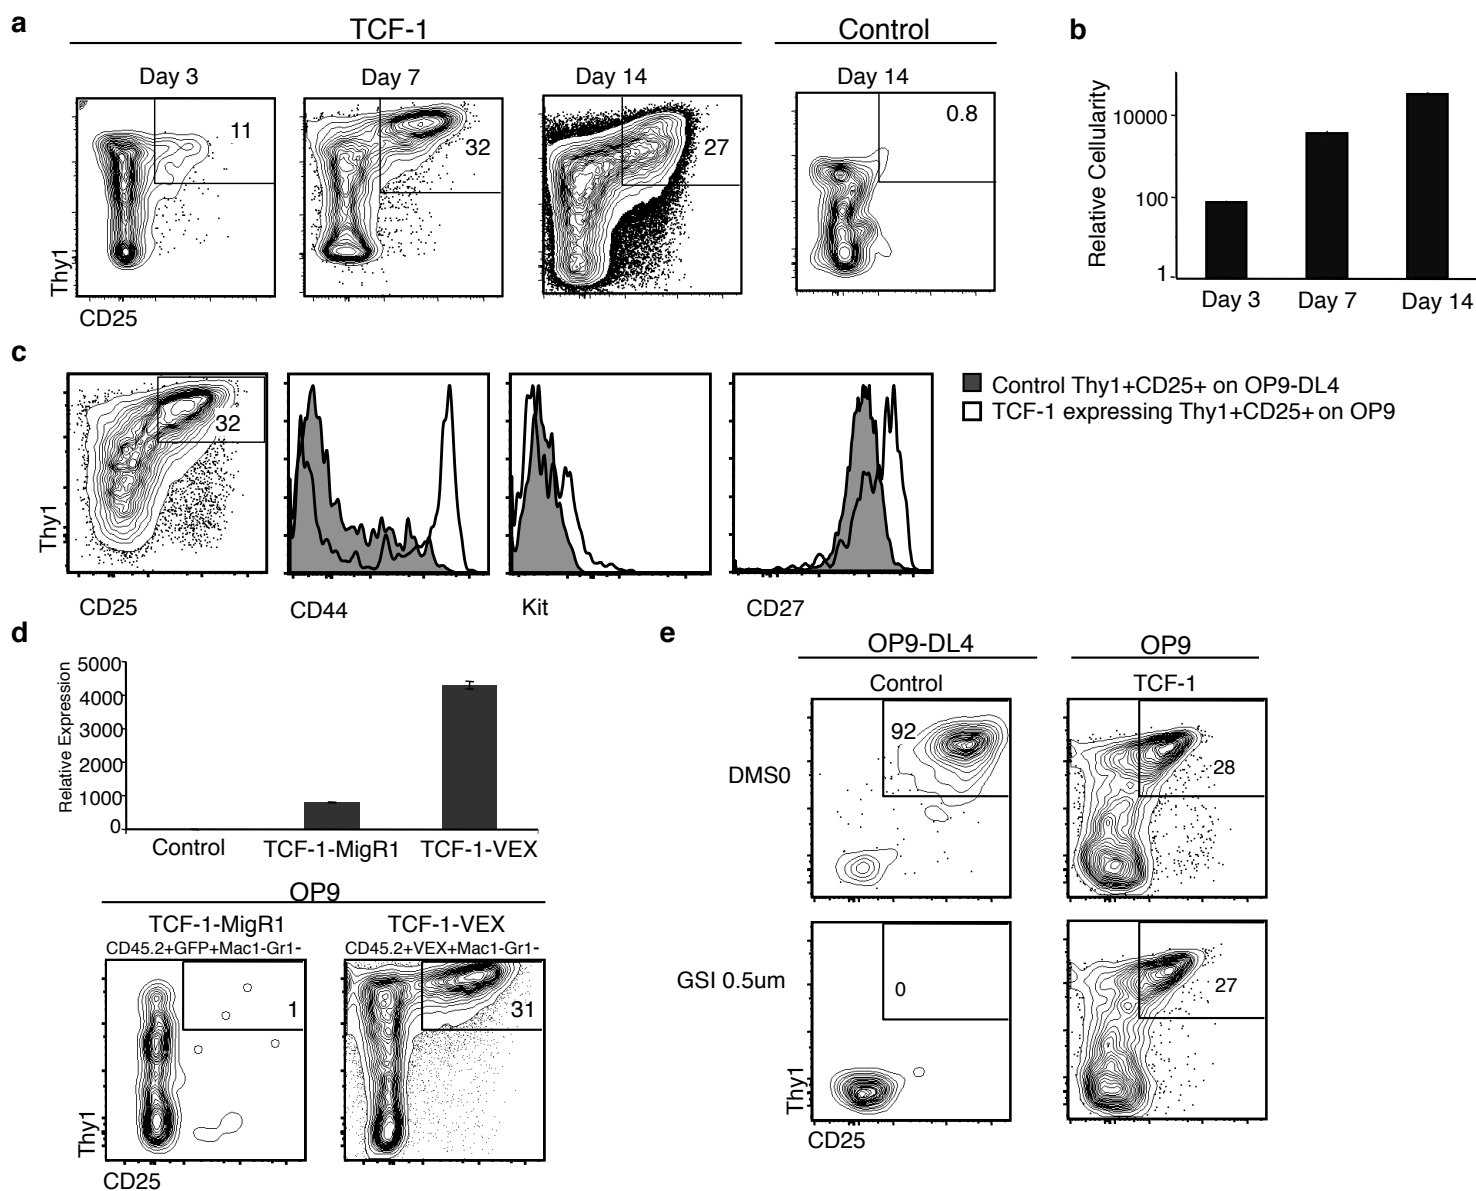

### Supplemental Figure 6: Characterization of TCF-1-expressing Thy1<sup>+</sup>CD25<sup>+</sup> cells.

**a**, Wt LMPPs were isolated and transduced with control MSCV-VEX or MSCV-TCF-1-VEX. Transduced cells were isolated by cell sorting, and seeded onto OP9 stroma. Plots are gated on VEX<sup>+</sup>CD45.2<sup>+</sup>Mac1<sup>-</sup>Gr1<sup>-</sup> cells. No Thy1<sup>+</sup>CD25<sup>+</sup> cells were observed from control-expressing cells at all timepoints examined.

**b**, Relative cellularity of TCF-1-expressing Thy1<sup>+</sup>CD25<sup>+</sup> cells cultured on OP9 stroma. **c**, Characterization of cell surface markers on TCF-1-expressing Thy1<sup>+</sup>CD25<sup>+</sup> cells after two weeks in culture. **d**, Wt LSK progenitors were transduced with TCF-1 in the GFP (MigR1) or VEX retroviral constructs. Shown is the relative expression of human and mouse TCF-1 48 hours later, normalized to LSK progenitors transduced with empty vector control. Below, transduced progenitors were also seeded onto OP9 and shown is a day 7 analysis. **e**, TCF-1-expressing or control LSK progenitors were seeded in equal number in triplicate on OP9-DL4 or OP9 in the presence of 0.5  $\mu$ m GSI or DMSO as control. Plots gated as described in (2a). Shown is day 12 analysis. All error bars, +/-s.e.m.

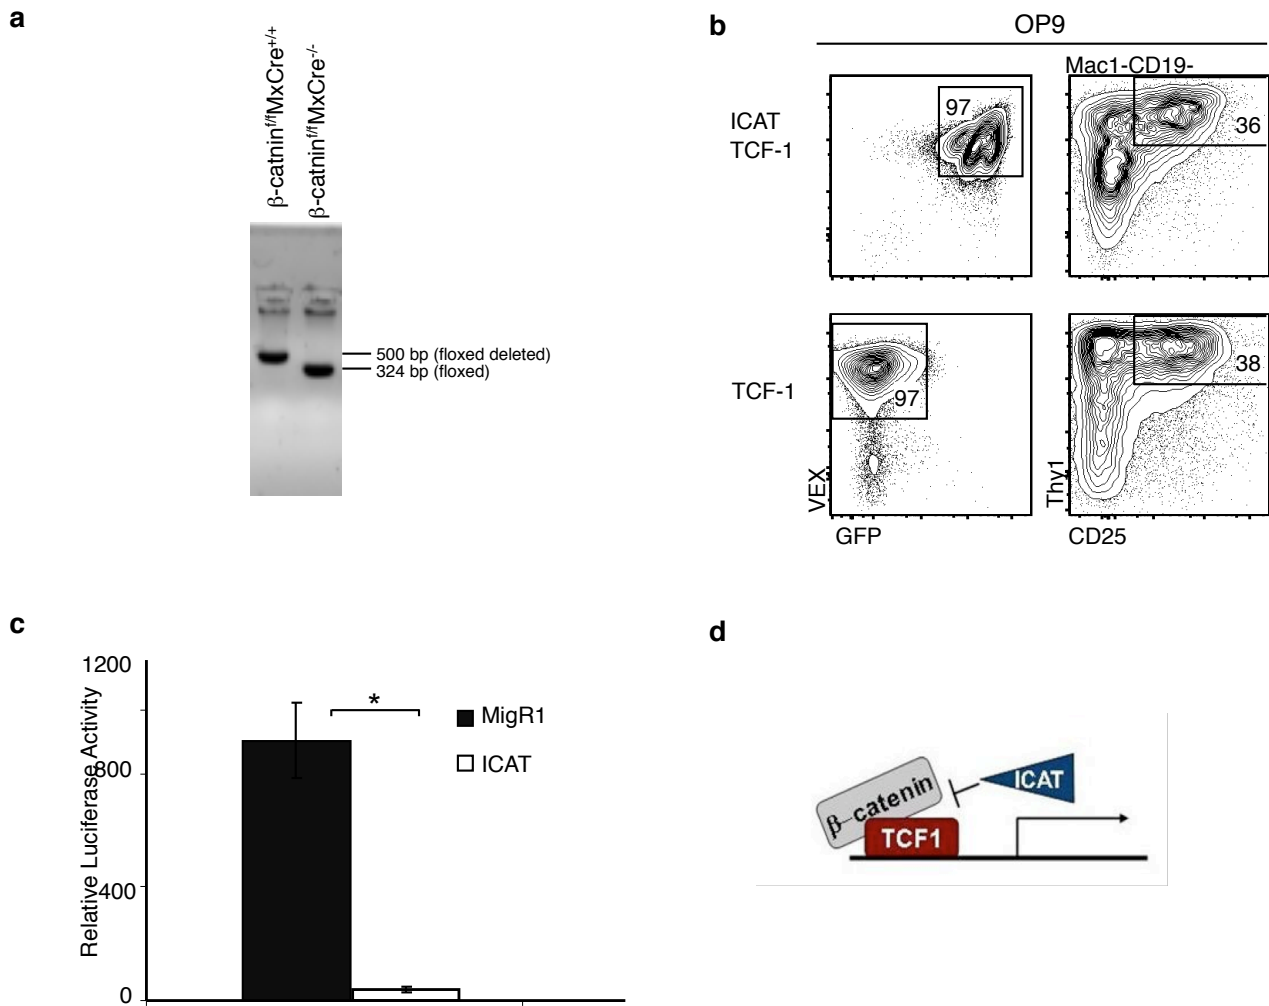

**Supplementary Figure 7. The development of TCF-1 expressing Thy1<sup>+</sup>CD25<sup>+</sup> cells is independent of β-catenin.**

**a**, Confirmation of β-catenin deletion by PCR of genomic DNA from β-catenin<sup>fl/fl</sup>MxCre<sup>+</sup> and β-catenin<sup>fl/fl</sup>MxCre<sup>-</sup> Thy1<sup>+</sup>CD25<sup>+</sup> cells isolated by cell sorting from day 10 cultures, performed as previously described<sup>31</sup>. **b**, ICAT is a small molecule inhibitor of β-catenin that disrupts the ability of β-catenin to interact with TCF-1<sup>36,17</sup>. Wt LMPP progenitors were isolated and transduced with both MSCV-ICAT (GFP) and MSCV-TCF-1-VEX or MSCV-TCF-1-VEX alone. Transduced cells were isolated by a second round of cell sorting and seeded on OP9 stroma. Shown is a representative example of day 12 cultures. **c**, ICAT was functionally able to inhibit the β-catenin/TCF-1 mediated activation of the TCF-1 reporter, TOPFLASH, which contains a series of multimerized TCF-1/LEF1 binding sites<sup>20</sup>. 293T cells were co-transfected with the TOPFLASH reporter, β-catenin<sup>ΔGSK</sup>, and TCF-1 and with either empty vector or MSCV-ICAT. Luciferase activity is shown relative to Renilla and normalized to an empty vector control. Bars represent mean of triplicates +/- SD, \**p*=0.0003. Results are representative of 3 independent experiments. **d**, Schematic representation of ICAT-mediated inhibition of β-catenin-TCF-1 interactions.

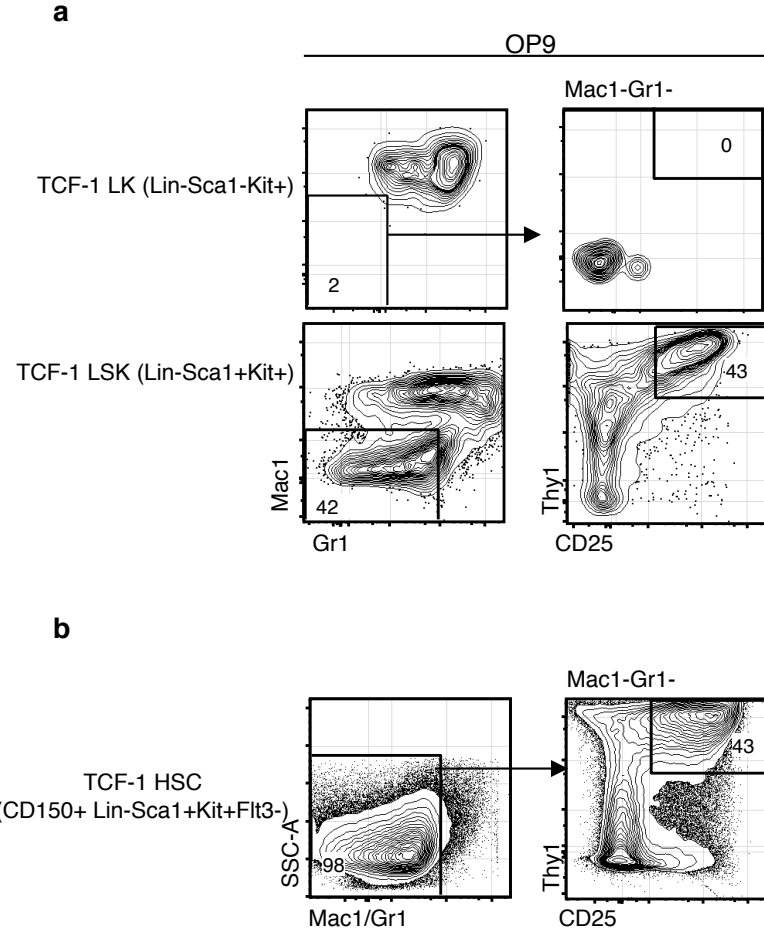

**Supplementary Figure 8. Ectopic expression of TCF-1 is sufficient to give rise to T-lineage cells from CD150<sup>+</sup> HSCs but not from myelo-erythroid progenitors.**

**a**, Lin-Sca1<sup>+</sup>Kit<sup>+</sup> (LK) myeloid progenitors or LSK progenitors from wt bone marrow were transduced with MSCV-TCF-1-VEX and seeded on OP9 for 10 days to assess the development of Thy1<sup>+</sup>CD25<sup>+</sup> T-lineage cells. Plots are gated on VEX<sup>+</sup>CD45.2<sup>+</sup> cells in culture. Thy1<sup>+</sup>CD25<sup>+</sup> T-lineage cells are observed from LSK cultures whereas ectopic expression of TCF-1 in myeloid progenitors failed to upregulate surface expression of Thy1 and CD25. **b**, CD150<sup>+</sup>Lin-Sca1<sup>+</sup>Kit<sup>+</sup>Flt3<sup>-</sup> fetal liver HSCs were transduced with MSCV-TCF-1-VEX. VEX<sup>+</sup> cells were isolated by cell sorting, then seeded on OP9 stromal cells. Shown is the development of Thy1<sup>+</sup>CD25<sup>+</sup> T-lineage cells from day 14 cultures. Plots are gated on VEX<sup>+</sup>CD45<sup>+</sup> hematopoietic cells.



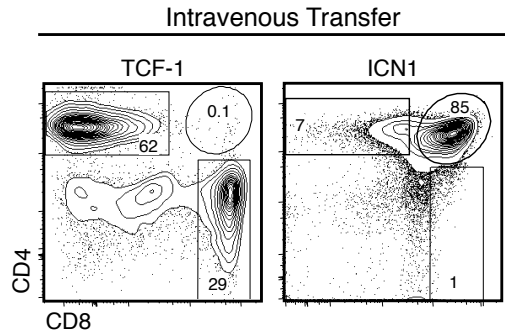

**Supplementary Figure 9. Ectopic expression of TCF-1 in progenitors in vivo does not cause T-cell leukemia.**

To determine whether ectopic expression of TCF-1 results in T-cell acute lymphoblastic leukemia (T-ALL) as observed with ectopic expression of Notch1 (ICN1), TCF-1 or ICN1-expressing LSK progenitors were intravenously transferred into lethally irradiated recipients. Mice were analyzed at various timepoints for the presence of T-ALL. A representative example at 8 weeks in spleen is shown. Plots are gated on donor derived CD45.2<sup>+</sup>VEX<sup>+</sup> (TCF-1) or CD45.2<sup>+</sup>GFP<sup>+</sup> (ICN1) splenocytes.

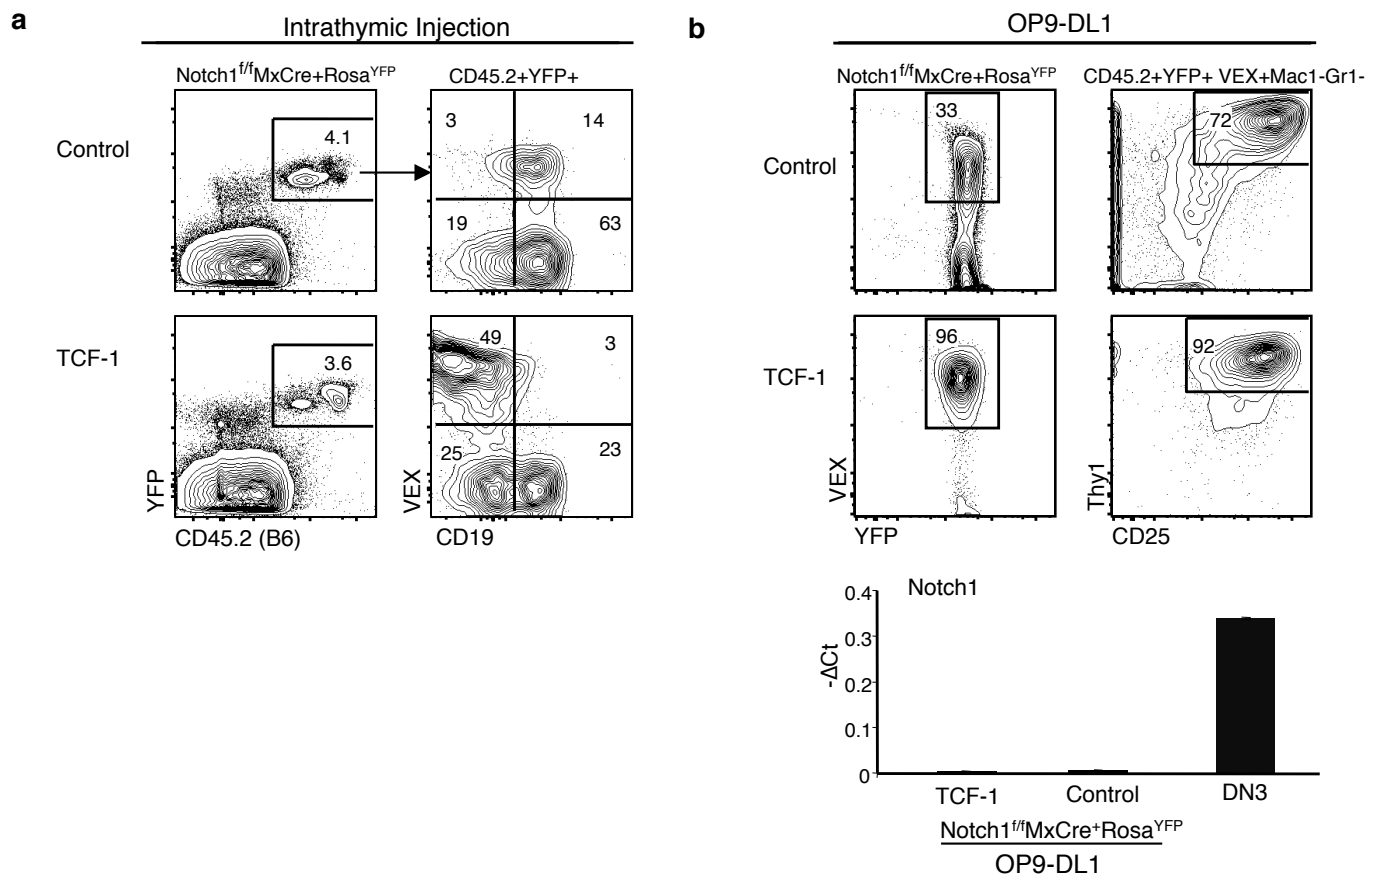

**Supplementary Figure 10: B-cells expand in  $Notch1^{f/f}MxCre+Rosa^{YFP}$  control-expressing cells in the thymus.**

**a**, B-cell development was analyzed in the thymus after intrathymic injection of TCF-1 or control-expressing  $Notch1^{f/f}MxCre+Rosa^{YFP}$  progenitors. Notch1 deletion results in the expansion of B-cells in the thymus from control-expressing progenitors<sup>37</sup>. Ectopic expression of TCF-1 inhibited the development of B-cells, and only the TCF-1 negative (VEX negative) donor cells developed into B-cells. These data are consistent with the in vitro data (Fig. 2b) and suggest that TCF-1 is able to inhibit B-cell development in vivo and in vitro. **b**, Confirmation of Notch1 deletion in  $Notch1^{f/f}MxCre+Rosa^{YFP}$  progenitors. Deletion of Notch1 was first confirmed via genomic PCR<sup>30</sup>. For further confirmation,  $Notch1^{f/f}MxCre+Rosa^{YFP}$  TCF-1 and VEX-expressing progenitors were seeded on OP9-DL1 stroma, which signals progenitors through Notch2 in addition through Notch1. Prior work has shown that Notch2 signaling is sufficient to induce T lineage commitment from  $Notch1^{-/-}$  progenitors in vitro on OP9-DL1<sup>38</sup>. However, Notch2 does not drive T cell development in the thymus, likely because the relevant Notch ligands are not present<sup>39</sup>. This approach allowed us to obtain  $Thy1^+CD25^+$  cells from both  $Notch1^{f/f}MxCre+Rosa^{YFP}$  TCF-1 and control-expressing cells which were analyzed for Notch1 expression. Samples were normalized to GAPDH. Error bars are s.e.m.

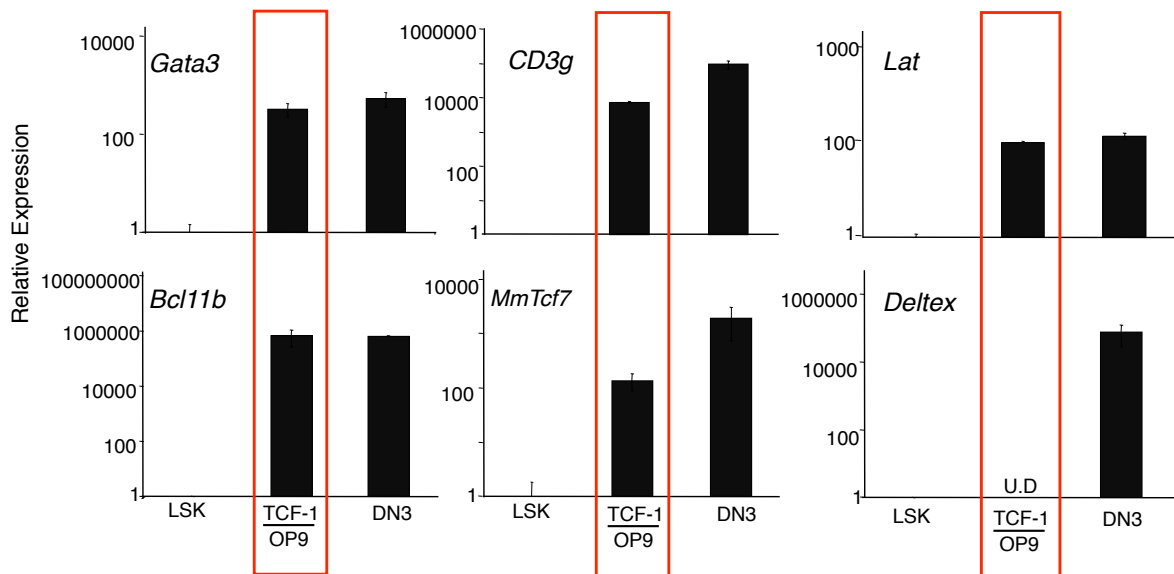

**Supplemental Figure 11. TCF-1-expressing T-lineage cells from fetal liver progenitors express potential TCF-1 gene targets at comparable levels to DN3 thymocytes.**

CCR9<sup>+</sup>Lin<sup>-</sup>Sca1<sup>+</sup>Kit<sup>+</sup>Flt3<sup>+</sup> lymphoid progenitors from fetal liver were retrovirally transduced with MCSV-TCF-1-VEX for 48 hours in a cytokine cocktail containing IL3, IL6, and SCF. VEX-expressing cells were obtained by cell sorting and seeded onto OP9 stromal cells. TCF-1-expressing Thy1<sup>+</sup>CD25<sup>+</sup> T-lineage cells were harvested from day 10 cultures. QRT-PCR analysis was performed on T-lineage genes shown in Figure 3b. Shown is the relative expression compared to LSK progenitors. Error bars are s.e.m.

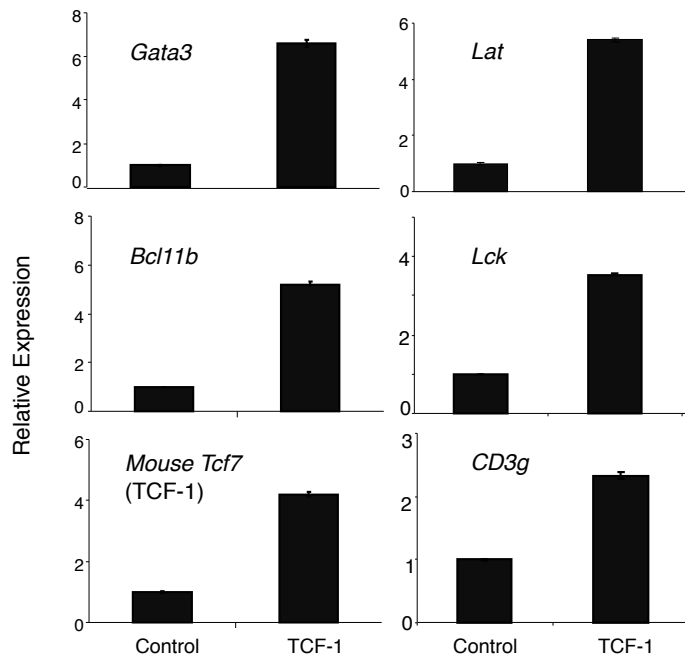

**Supplementary Figure 12. TCF-1 gene targets are induced within 48 hours of retroviral transduction.**

LSK progenitors from wt BM were transduced with MSCV-TCF-1-VEX or control virus, MSCV-VEX for 48 hours. Cells were harvested and cell sorted for VEX<sup>+</sup> cells and RNA was made from equal numbers of control and TCF-1-expressing progenitors. QRT-PCR analysis was performed on potential TCF-1 gene targets. Shown is the relative expression of TCF-1 gene targets compared to control LSK after normalizing to 18sRNA. Error bars are s.e.m.

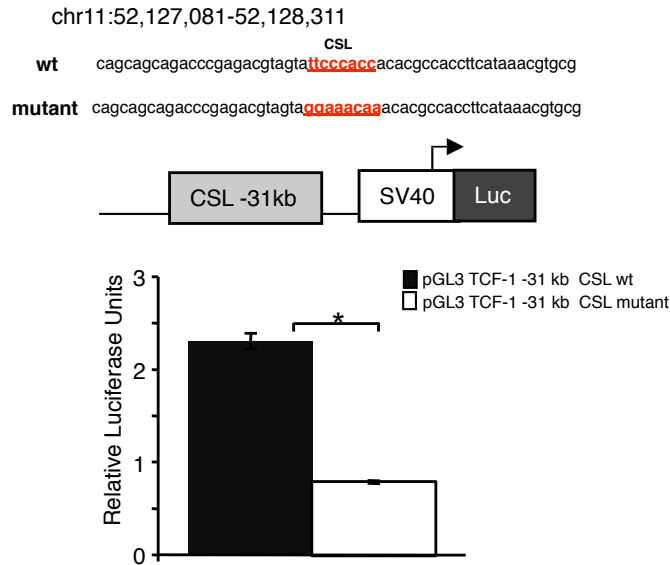

**Supplementary Figure 13. -31kb CSL binding site upstream of TCF-1 is ICN1 responsive in a reporter assay.**

The -28kb and -31kb CSL binding sites were cloned separately upstream into a pGL3 vector containing the SV40 promoter to determine if these CSL sites are responsive to activation by MSCV-ICN1. Consistent with the absence of Notch1 localization shown in the chromatin immunoprecipitation assays in Fig. 4b, we failed to detect activation of the -28kb construct and therefore focused on mutagenesis and analysis of the -31kb CSL binding site. Genomic coordinates represent the entire sequence cloned into the vector and below we show the mutagenesis of the CSL binding site. 293T cells were transiently co-transfected with the pGL3 SV40 promoter vector (200ng/well) containing the wildtype -31kb CSL binding site or a vector in which the CSL binding site was mutated and MSCV-ICN1 (100ng/well). Data were analyzed by comparing Luciferase activity to Renilla activity and adjusted to the fold increase over empty vector. Error bars are s.e.m., \* $p < 0.0001$ .

Supplementary Table 1: The list of primers in this study

**TCF-1 ChIP**

| qPCR primers        | Primer Sequence (5' to 3')  |
|---------------------|-----------------------------|
| Cd3e-3`enhancer-Fwd | CGTTCATGTGCCTTGTGTGT        |
| Cd3e-3`enhancer-Rev | TCATTGCAGTGCTTCCTGTT        |
| CD3e-Negcontrol-Fwd | TCTCTTGACTTCTGGCAGAGC       |
| CD3e-Negcontrol-Rev | GTGTGAGCCGAAAGAAAAGG        |
| Axin2-3kb-Fwd       | TTAAAGCGCCTCTGTGATTG        |
| Axin2-3kb-Rev       | CGCGAACGGCTGCTTATT          |
| Tcf7-1.3kb-Fwd      | TTTGTGAAGGAGGACACTGG        |
| Tcf7-1.3kb-Rev      | CTGAGCGCTGAGAAGCAAG         |
| Tcf7-4kb-Fwd        | AAATCATCCGACCGTTCTCA        |
| Tcf7-4kb-Rev        | AGGATCTCCCGGTTAGGAAA        |
| Bcl11b-2kb-Fwd      | GTCGTCCCCCTCCTCCAT          |
| Bcl11b-2kb-Rev      | ACTGCAGCCTGGCCTTGT          |
| Gata3-1.7kb-Fwd     | GGGAAAGCAAGCAGAGACCA        |
| Gata3-1.7kb-Rev     | TTGCCTCCGAACCAGCTTTC        |
| CD25-6kb-Fwd        | TTCAGAGCCCAGTGTAAGAGC       |
| CD25-6kb-Rev        | TGTCTATCAATGTCTTGAGAAGTCTAC |

**Notch1 ChIP**

| qPCR primers            | Primer Sequence (5' to 3') |
|-------------------------|----------------------------|
| Tcf7-CSL-28kb-Fwd       | CATTTTGCATCTGGGCTACA       |
| Tcf7-CSL-28kb-Rev       | GGATGCCAGTCAAGGAAAAT       |
| Tcf7-CSL-31kb-Fwd       | CGAACCCCAGCAAGAAATAG       |
| Tcf7-CSL-31kb-Rev       | ACAAAGCGACCACAGCTTTT       |
| Tcf7-CSL-negcontrol-Fwd | CCCCCTGCTCTCTGTATG         |
| Tcf7-CSL-negcontrol-Rev | ATGAACACATTTGCCACAGC       |

**Genotyping Primers**

| qPCR primers          | Primer Sequence (5' to 3') |
|-----------------------|----------------------------|
| Tcf7-exon7-Fwd        | ACCTTTTACCCCAGCTTTC        |
| Tcf7-exon7-Rev        | ATCCCTTTCCTGTGTTGAG        |
| Tcf7-Pn5B             | CTAAAGCGCATGCTCCAGACT      |
| Notch1f/f-Fwd         | TGCCCTTTCCTTAAAAGTGG       |
| Notch1f/f-Rev         | GCCTACTCCGACACCCAATA       |
| Beta catenin-Rm41-Fwd | AAGGTAGAGTGATGAAAGTTGTT    |
| Beta catenin-Rm42-Rev | CACCATGTCCTCTGTCTATTC      |
| Beta catenin-Rm43-Fwd | TACTACTATTGAATCACAGGGACTT  |

**RT-PCR primers** (Unless stated here, all other genes were detected with Taqman probes)

| qPCR primers | Primer Sequence (5' to 3') |
|--------------|----------------------------|
| HuMmTcf7-Fwd | AGGAGATGAGAGCCAAGGTCATTG   |
| HuMmTcf7-Rev | TTTTCCTCCTGTGGTGGATTCTTG   |
| TCRg-V3-Fwd  | TGCCTCTTGACATTTGGACA       |
| TCRg-V3-Rev  | GTTTCTGCCGGTACCAGTGT       |

Supplementary Table 2: Two fold gene lists from Figure 1e

| Gene symbol   | Tcf1 <sup>+/+</sup> lineage negative<br>to Tcf1 <sup>+/+</sup> Thy1 <sup>+</sup> CD25 <sup>+</sup> |             | Tcf1 <sup>-/-</sup> lineage negative to<br>Tcf1 <sup>+/+</sup> Thy1 <sup>+</sup> CD25 <sup>+</sup> |             |
|---------------|----------------------------------------------------------------------------------------------------|-------------|----------------------------------------------------------------------------------------------------|-------------|
|               | p-value                                                                                            | Fold change | p-value                                                                                            | Fold change |
| Il2ra         | 0.00150553                                                                                         | 38.2994     | 0.000898665                                                                                        | 77.6214     |
| Cd3g          | 0.00396569                                                                                         | 66.4554     | 0.00560987                                                                                         | 55.2367     |
| H19           | 0.00327325                                                                                         | 20.9391     | 0.00413762                                                                                         | 22.686      |
| Thy1          | 0.00414442                                                                                         | 13.4071     | 0.00553657                                                                                         | 13.2003     |
| Plxdc2        | 0.00396569                                                                                         | 9.76399     | 0.00451203                                                                                         | 12.5921     |
| Fam20a        | 0.016421                                                                                           | 11.7184     | 0.0205669                                                                                          | 12.0765     |
| Tcf7          | 0.00150553                                                                                         | 7.24097     | 0.000898665                                                                                        | 10.2718     |
| Khdc1a        | 0.00153744                                                                                         | 9.87848     | 0.00150467                                                                                         | 8.80815     |
| Akr1c12       | 0.00692664                                                                                         | 8.66694     | 0.00902261                                                                                         | 8.77418     |
| Rag1          | 0.0177877                                                                                          | 9.96093     | 0.0251491                                                                                          | 8.76263     |
| Gzma          | 0.00214639                                                                                         | 9.44172     | 0.00286922                                                                                         | 8.47202     |
| Ppic          | 0.00711807                                                                                         | 7.23659     | 0.00910223                                                                                         | 7.36651     |
| Esm1          | 0.00158583                                                                                         | 6.55667     | 0.00150467                                                                                         | 7.18497     |
| Khdc1a        | 0.00379337                                                                                         | 6.94018     | 0.00474476                                                                                         | 7.03651     |
| Cd3d          | 0.0370292                                                                                          | 7.30749     | 0.049386                                                                                           | 6.88053     |
| A630038E17Rik | 0.00388911                                                                                         | 6.54783     | 0.00496816                                                                                         | 6.49016     |
| Khdc1b        | 0.00277886                                                                                         | 6.09591     | 0.00297244                                                                                         | 6.00702     |
| Gzmb          | 0.00281801                                                                                         | 5.01813     | 0.00297244                                                                                         | 5.75194     |
| Trat1         | 0.0260714                                                                                          | 5.66658     | 0.0329648                                                                                          | 5.59342     |
| Tubb3         | 0.0280051                                                                                          | 4.61485     | 0.0267732                                                                                          | 5.52619     |
| Cpa3          | 0.01983                                                                                            | 5.22772     | 0.0236131                                                                                          | 5.42861     |
| Sytl3         | 0.00734747                                                                                         | 4.96518     | 0.00868337                                                                                         | 5.41409     |
| Lat           | 0.00476035                                                                                         | 4.87636     | 0.00611962                                                                                         | 5.27951     |
| Fam169b       | 0.00676086                                                                                         | 6.05441     | 0.0104523                                                                                          | 5.24574     |
| Gm4827        | 0.0180913                                                                                          | 4.82456     | 0.0212223                                                                                          | 5.12475     |
| Psg17         | 0.0112938                                                                                          | 4.33281     | 0.0132658                                                                                          | 4.62012     |
| Akr1c13       | 0.00491926                                                                                         | 4.83568     | 0.00726395                                                                                         | 4.55175     |
| Ctla4         | 0.027689                                                                                           | 4.77573     | 0.0381514                                                                                          | 4.48349     |
| Cd160         | 0.0116884                                                                                          | 3.28632     | 0.00902261                                                                                         | 4.44302     |
| Prkcq         | 0.00623994                                                                                         | 5.44873     | 0.0107804                                                                                          | 4.41367     |
| Stk39         | 0.00911994                                                                                         | 4.18337     | 0.0124078                                                                                          | 4.01837     |
| Txk           | 0.0313943                                                                                          | 3.77677     | 0.0368402                                                                                          | 3.91816     |
| Tnfsf10       | 0.0110426                                                                                          | 4.62601     | 0.0188152                                                                                          | 3.91739     |
| Muc13         | 0.00564899                                                                                         | 4.34653     | 0.00938953                                                                                         | 3.76571     |
| Arpp21        | 0.0166545                                                                                          | 3.82712     | 0.0221932                                                                                          | 3.69017     |
| Gimap1        | 0.0414729                                                                                          | 3.43208     | 0.0464341                                                                                          | 3.63799     |
| Il17rb        | 0.0103649                                                                                          | 3.66105     | 0.014305                                                                                           | 3.54381     |
| Sestd1        | 0.00357872                                                                                         | 2.66189     | 0.00297244                                                                                         | 3.41856     |
| Naip3         | 0.00414442                                                                                         | 2.47717     | 0.00323591                                                                                         | 3.41332     |
| Adamts3       | 0.00327172                                                                                         | 3.70585     | 0.00455821                                                                                         | 3.35704     |
| Prkca         | 0.0708287                                                                                          | 2.65884     | 0.0548791                                                                                          | 3.30078     |
| Slc22a3       | 0.00887696                                                                                         | 3.57962     | 0.0139737                                                                                          | 3.2395      |
| Mpp4          | 0.0118514                                                                                          | 3.06271     | 0.01401                                                                                            | 3.23012     |
| E030002O03Rik | 0.0157658                                                                                          | 3.47217     | 0.022654                                                                                           | 3.22259     |
| 1190002H23Rik | 0.0280304                                                                                          | 2.95123     | 0.0288635                                                                                          | 3.21376     |
| Xrcc5         | 0.00327325                                                                                         | 3.57666     | 0.00482782                                                                                         | 3.16686     |
| Gimap9        | 0.0143313                                                                                          | 2.81319     | 0.0147111                                                                                          | 3.14645     |
| Adamts3       | 0.0286895                                                                                          | 3.51919     | 0.0458602                                                                                          | 3.11672     |



|               |            |         |            |         |
|---------------|------------|---------|------------|---------|
| Gm6683        | 0.033189   | 2.86974 | 0.034934   | 3.11037 |
| Cxcr5         | 0.00658826 | 3.61568 | 0.011346   | 3.09281 |
| Tuba8         | 0.00533863 | 3.41419 | 0.00872093 | 3.09022 |
| Armcx4        | 0.0223493  | 2.86027 | 0.0240721  | 3.07745 |
| Gm13926       | 0.00449176 | 2.64616 | 0.00482782 | 3.03774 |
| Vat1l         | 0.00673627 | 3.16111 | 0.00940567 | 3.02695 |
| Gm5111        | 0.020359   | 3.29363 | 0.0300998  | 3.02269 |
| Gata3         | 0.0142867  | 3.19352 | 0.0212866  | 2.96663 |
| Dnahc8        | 0.00836105 | 2.92012 | 0.0106266  | 2.90265 |
| F2r           | 0.0070842  | 2.8153  | 0.00902261 | 2.86991 |
| Cpne2         | 0.0584699  | 2.71331 | 0.0659239  | 2.84636 |
| Lif           | 0.00342238 | 3.12348 | 0.00503469 | 2.82309 |
| Tcrg-V3       | 0.00524884 | 2.10355 | 0.00423568 | 2.8042  |
| Ccr4          | 0.0354161  | 2.58561 | 0.0365452  | 2.79638 |
| A130014H13Rik | 0.254625   | 2.81579 | 0.294708   | 2.78153 |
| Mfsd2         | 0.0114308  | 2.60983 | 0.0131137  | 2.75419 |
| Adamts3       | 0.0134211  | 3.22685 | 0.0234355  | 2.75278 |
| Clec4e        | 0.00741965 | 2.97519 | 0.0115854  | 2.72468 |
| Ets1          | 0.0267514  | 2.44743 | 0.025733   | 2.71659 |
| Nck2          | 0.00327172 | 2.67156 | 0.00401515 | 2.71337 |
| Gimap5        | 0.0182623  | 2.46679 | 0.0189806  | 2.69739 |
| Adamts3       | 0.00731341 | 2.58407 | 0.0087836  | 2.6929  |
| Sytl2         | 0.0392283  | 2.66215 | 0.051259   | 2.6141  |
| Pcdh7         | 0.00836105 | 2.97738 | 0.0147111  | 2.60968 |
| B4galnt2      | 0.00396569 | 2.79732 | 0.00611962 | 2.60536 |
| Ndrp2         | 0.0728253  | 2.89628 | 0.115783   | 2.58413 |
| Kbtbd11       | 0.0381592  | 2.18011 | 0.029435   | 2.58053 |
| 4933415A04Rik | 0.0114029  | 2.4141  | 0.0124078  | 2.57437 |
| Itga2b        | 0.00521472 | 2.49107 | 0.00703707 | 2.51199 |
| Ctla2b        | 0.0257271  | 2.78391 | 0.0419153  | 2.49884 |
| Entpd5        | 0.0197741  | 2.62776 | 0.0284614  | 2.48441 |
| Dnmt3b        | 0.0134196  | 2.62382 | 0.0198663  | 2.47969 |
| Rasgrp1       | 0.0678147  | 2.55277 | 0.0907044  | 2.47948 |
| Lrp12         | 0.00516306 | 2.75441 | 0.00893189 | 2.46335 |
| Sstr2         | 0.0262152  | 2.88354 | 0.0483883  | 2.45579 |
| AI847670      | 0.00265423 | 2.35071 | 0.00297244 | 2.42605 |
| Irgm2         | 0.00317962 | 1.95232 | 0.00280101 | 2.42555 |
| Tox           | 0.058171   | 2.10265 | 0.0482551  | 2.41917 |
| Rag2          | 0.0391207  | 2.92586 | 0.079532   | 2.40243 |
| Lgals9        | 0.011868   | 2.79428 | 0.0219571  | 2.3974  |
| 2900006K08Rik | 0.0157658  | 2.15191 | 0.0152422  | 2.37182 |
| Svil          | 0.00517266 | 2.31309 | 0.0067748  | 2.36873 |
| A630091E08Rik | 0.158758   | 2.14842 | 0.151965   | 2.36161 |
| Aqp11         | 0.02278    | 2.56104 | 0.0361745  | 2.3554  |
| D330050I23Rik | 0.0142867  | 2.21636 | 0.0154339  | 2.35497 |
| Zfp709        | 0.0538455  | 1.72646 | 0.0232888  | 2.35333 |
| Fam40b        | 0.0980647  | 2.76191 | 0.17074    | 2.34587 |
| Epcam         | 0.0104322  | 2.40526 | 0.0147111  | 2.33935 |
| Tmtc2         | 0.142092   | 2.15574 | 0.140742   | 2.33416 |
| Zbtb16        | 0.0330588  | 2.12605 | 0.0320952  | 2.30366 |
| Fbp1          | 0.0656894  | 2.34537 | 0.0863605  | 2.29879 |
| Lck           | 0.00613889 | 2.86126 | 0.014251   | 2.29094 |

|               |            |          |            |          |
|---------------|------------|----------|------------|----------|
| Hcfc2         | 0.00357933 | 2.03369  | 0.00336175 | 2.29079  |
| Irak3         | 0.0866219  | 2.24152  | 0.0998889  | 2.28957  |
| AA467197      | 0.157634   | 2.16674  | 0.16704    | 2.27765  |
| Dpp4          | 0.0236635  | 2.3103   | 0.0308824  | 2.26898  |
| Camk2d        | 0.0718744  | 2.28018  | 0.0914124  | 2.26289  |
| Enah          | 0.0483016  | 1.84885  | 0.030388   | 2.26198  |
| Als2          | 0.0192058  | 2.02109  | 0.0182719  | 2.25324  |
| 2610020H08Rik | 0.0286567  | 2.04326  | 0.0267671  | 2.24574  |
| Rab44         | 0.00414442 | 2.28949  | 0.00629113 | 2.23835  |
| Bcl2l1        | 0.0204906  | 2.39923  | 0.0311969  | 2.23477  |
| Med12l        | 0.0070842  | 2.22363  | 0.0092128  | 2.21906  |
| Adamts3       | 0.0187973  | 2.29468  | 0.0274993  | 2.16129  |
| Dgke          | 0.0364036  | 2.07313  | 0.0395325  | 2.16084  |
| Adamts9       | 0.028242   | 2.20452  | 0.0374741  | 2.16057  |
| 2610301F02Rik | 0.112571   | 2.15109  | 0.136241   | 2.15538  |
| 4930520O04Rik | 0.0439397  | 1.98364  | 0.0421967  | 2.15466  |
| Fgf3          | 0.0145588  | 2.07387  | 0.017025   | 2.14453  |
| Dnajc6        | 0.0100554  | 2.78272  | 0.0251668  | 2.13835  |
| Slc15a1       | 0.128455   | 2.03351  | 0.135639   | 2.13781  |
| Ctla2a        | 0.019125   | 2.26884  | 0.0287405  | 2.1331   |
| Gpr56         | 0.034057   | 2.58752  | 0.0734582  | 2.12758  |
| Hemgn         | 0.0714063  | 2.14923  | 0.0918059  | 2.1248   |
| Cdkn1a        | 0.0198365  | 2.26372  | 0.0300998  | 2.11685  |
| Kcnk5         | 0.0208959  | 2.32061  | 0.0358016  | 2.10256  |
| Trim13        | 0.00996153 | 1.90049  | 0.00914343 | 2.10209  |
| Nefh          | 0.0129427  | 2.14002  | 0.0180363  | 2.0975   |
| Ddx3y         | 0.932978   | -1.48423 | 0.87804    | 2.07215  |
| Rnf125        | 0.135126   | 2.30298  | 0.210601   | 2.06975  |
| Adamts3       | 0.00499847 | 2.18351  | 0.0081728  | 2.0505   |
| Mycn          | 0.046907   | 2.12785  | 0.0675716  | 2.04715  |
| Gm12250       | 0.0273164  | 1.90956  | 0.0268174  | 2.04609  |
| Grit          | 0.0178533  | 1.81435  | 0.0149624  | 2.04329  |
| Actr3b        | 0.0222144  | 2.06589  | 0.0289594  | 2.04064  |
| Dnahc8        | 0.0260142  | 1.97839  | 0.0296096  | 2.0262   |
| Inpp4b        | 0.0956938  | 1.95201  | 0.104327   | 2.02199  |
| Hivep2        | 0.0341278  | 2.04691  | 0.0443725  | 2.01854  |
| Pp11r         | 0.065397   | 2.37314  | 0.129275   | 2.01615  |
| Plscr1        | 0.0343549  | 1.80927  | 0.0284614  | 2.01475  |
| Gpr87         | 0.0749238  | 2.21012  | 0.123015   | 2.01048  |
| Crip1         | 0.016421   | 2.07368  | 0.022654   | 2.01009  |
| Asph          | 0.031506   | 1.79318  | 0.0258874  | 2.00913  |
| Rag2          | 0.0564862  | 2.23905  | 0.0991575  | 2.00745  |
| H2-Aa         | 0.002826   | -41.3905 | 0.003236   | -39.7481 |
| Klrd1         | 0.001506   | -52.231  | 0.001504   | -37.8282 |
| H2-Ab1        | 0.002348   | -28.0605 | 0.002972   | -26.724  |
| Nucb2         | 0.00349    | -30.1197 | 0.004828   | -24.5633 |
| Ifi205        | 0.002818   | -22.919  | 0.003236   | -22.0298 |
| Mpeg1         | 0.002826   | -22.1687 | 0.003444   | -20.4156 |
| Ctsh          | 0.002348   | -23.8919 | 0.002972   | -18.9326 |
| Clec9a        | 0.003257   | -23.2537 | 0.004427   | -18.6304 |
| Cybb          | 0.003272   | -24.3794 | 0.004719   | -17.5859 |
| Rnd3          | 0.004428   | -19.6849 | 0.006775   | -17.0234 |

|               |          |          |          |          |
|---------------|----------|----------|----------|----------|
| Plbd1         | 0.00257  | -15.9281 | 0.002972 | -15.5872 |
| Hpgd          | 0.003966 | -23.6862 | 0.006775 | -15.2337 |
| S100a8        | 0.010085 | -23.1286 | 0.018594 | -15.0802 |
| Kynu          | 0.003889 | -21.7687 | 0.006634 | -14.211  |
| Aif1          | 0.001586 | -13.5258 | 0.001505 | -14.0974 |
| Cd74          | 0.003798 | -16.2745 | 0.005366 | -14.0784 |
| Ctss          | 0.007947 | -16.3186 | 0.011418 | -14.0148 |
| Flt3          | 0.002194 | -16.0217 | 0.002972 | -13.675  |
| Map4k5        | 0.002654 | -14.9674 | 0.002972 | -13.5688 |
| Klrk1         | 0.002961 | -15.2532 | 0.004015 | -12.9627 |
| Ms4a4c        | 0.004144 | -15.1293 | 0.006803 | -11.8751 |
| Dirc2         | 0.00188  | -14.4243 | 0.002801 | -11.2249 |
| Siglech       | 0.003273 | -16.2668 | 0.005327 | -11.1681 |
| Ms4a6c        | 0.006901 | -11.6164 | 0.009431 | -10.7671 |
| Tlr11         | 0.006123 | -11.868  | 0.009023 | -10.4568 |
| Csf1r         | 0.003273 | -10.1809 | 0.004236 | -10.2796 |
| Rnase6        | 0.002348 | -12.3544 | 0.002972 | -10.0486 |
| Lyz2          | 0.008695 | -13.8618 | 0.016379 | -9.34991 |
| Itgax         | 0.001586 | -9.73555 | 0.001505 | -9.252   |
| Slamf7        | 0.004144 | -13.1945 | 0.007333 | -9.21189 |
| H2-Eb1        | 0.002667 | -10.041  | 0.003136 | -9.06281 |
| S100a9        | 0.012709 | -15.7637 | 0.027846 | -8.62865 |
| Kmo           | 0.005948 | -9.26372 | 0.008683 | -8.54477 |
| Ms4a3         | 0.027071 | -7.93667 | 0.031087 | -8.4761  |
| Gm6377        | 0.009665 | -8.16887 | 0.011961 | -8.45041 |
| Ly86          | 0.002527 | -9.60155 | 0.002972 | -8.40732 |
| Tcfec         | 0.005753 | -8.26036 | 0.008005 | -8.25132 |
| Scpep1        | 0.002348 | -10.1576 | 0.002972 | -7.96684 |
| Cd7           | 0.00188  | -8.47416 | 0.002332 | -7.92266 |
| Entpd1        | 0.004094 | -6.71077 | 0.004828 | -7.70756 |
| Irf8          | 0.005249 | -8.08352 | 0.007433 | -7.63953 |
| Eltf1         | 0.011115 | -5.48005 | 0.009669 | -7.40738 |
| Pyhin1        | 0.006588 | -8.91346 | 0.010424 | -7.33177 |
| Lifr          | 0.002818 | -11.8273 | 0.004745 | -7.09463 |
| Al607873      | 0.013148 | -9.04695 | 0.022148 | -6.97433 |
| Crybg3        | 0.004021 | -7.9902  | 0.006258 | -6.83999 |
| Samd9l        | 0.004144 | -10.0786 | 0.008425 | -6.83714 |
| Pira2         | 0.003966 | -9.5909  | 0.007037 | -6.7716  |
| Cd86          | 0.013801 | -6.32439 | 0.016514 | -6.72871 |
| Lgmn          | 0.004144 | -7.38008 | 0.006491 | -6.54146 |
| Fam129a       | 0.003273 | -6.68795 | 0.004512 | -6.49873 |
| Bcl2a1a       | 0.005386 | -6.42596 | 0.007264 | -6.48643 |
| Gm5431        | 0.018991 | -7.96008 | 0.030043 | -6.47408 |
| Il1r1         | 0.063722 | -5.09771 | 0.058309 | -6.42722 |
| Jhdm1d        | 0.007313 | -7.21145 | 0.010992 | -6.30218 |
| Lrrk2         | 0.003273 | -7.12596 | 0.004585 | -6.26671 |
| Plxnc1        | 0.001995 | -7.41686 | 0.002801 | -6.24836 |
| 5430435G22Rik | 0.017315 | -6.51657 | 0.022736 | -6.23562 |
| Gm11428       | 0.011908 | -11.7381 | 0.030043 | -6.16904 |
| Ifitm6        | 0.016169 | -6.81849 | 0.022865 | -6.14944 |
| Cd300a        | 0.001586 | -6.25276 | 0.001638 | -6.07857 |
| Amica1        | 0.003949 | -7.11374 | 0.006238 | -5.93143 |

|               |          |          |          |          |
|---------------|----------|----------|----------|----------|
| Pion          | 0.004633 | -6.54705 | 0.007183 | -5.86016 |
| 9930111J21Rik | 0.002429 | -6.21472 | 0.002972 | -5.76522 |
| Gm6455        | 0.004144 | -3.60591 | 0.003236 | -5.72349 |
| Gm6455        | 0.004144 | -3.57295 | 0.003236 | -5.71638 |
| Btla          | 0.004623 | -7.48254 | 0.008553 | -5.69722 |
| Sp100         | 0.001995 | -6.33755 | 0.002801 | -5.68143 |
| 4930506M07Rik | 0.01474  | -5.72401 | 0.019619 | -5.62395 |
| H2-DMb2       | 0.022626 | -5.96355 | 0.031141 | -5.55406 |
| Bcl2a1b       | 0.007668 | -5.4494  | 0.009627 | -5.50335 |
| Bcl2a1d       | 0.00759  | -5.43594 | 0.009578 | -5.48019 |
| Jhdm1d        | 0.003624 | -6.34451 | 0.005361 | -5.45747 |
| Hpse          | 0.002638 | -5.13568 | 0.002972 | -5.42051 |
| Csf2rb        | 0.007096 | -5.33736 | 0.009143 | -5.3632  |
| Ccl3          | 0.007015 | -4.49577 | 0.007269 | -5.34796 |
| Aim1          | 0.006665 | -6.14882 | 0.010285 | -5.32893 |
| Klra17        | 0.016501 | -10.1823 | 0.044835 | -5.29643 |
| Pgap1         | 0.014982 | -7.12562 | 0.028302 | -5.14817 |
| Id2           | 0.004721 | -5.1818  | 0.006634 | -5.13053 |
| Xcr1          | 0.015468 | -4.93994 | 0.01905  | -5.10176 |
| Raet1b        | 0.018989 | -4.99093 | 0.023883 | -4.93076 |
| Psap          | 0.002348 | -4.85014 | 0.002972 | -4.82013 |
| Lrrc4c        | 0.10375  | -4.2634  | 0.106739 | -4.79562 |
| Cd300c        | 0.005249 | -6.54083 | 0.010244 | -4.77182 |
| Anpep         | 0.008097 | -4.86297 | 0.010627 | -4.73687 |
| Rassf4        | 0.003795 | -6.07205 | 0.006495 | -4.64269 |
| Mef2c         | 0.01385  | -4.57354 | 0.017869 | -4.59016 |
| Pira11        | 0.00461  | -6.28479 | 0.009143 | -4.52067 |
| Csf2rb2       | 0.004144 | -5.41801 | 0.007037 | -4.5027  |
| Klri2         | 0.009475 | -5.88818 | 0.018274 | -4.49185 |
| Ceacam1       | 0.009923 | -5.61864 | 0.018255 | -4.4546  |
| Pgap1         | 0.021293 | -6.95176 | 0.05078  | -4.41707 |
| Cadm1         | 0.003555 | -5.85435 | 0.006258 | -4.40299 |
| 9030625A04Rik | 0.00912  | -4.86379 | 0.013974 | -4.38088 |
| Sat1          | 0.004144 | -4.66401 | 0.006258 | -4.3161  |
| 9030420J04Rik | 0.023273 | -4.91678 | 0.036289 | -4.30787 |
| Fkbp1b        | 0.002828 | -5.36518 | 0.004512 | -4.30338 |
| Cd36          | 0.015621 | -3.73511 | 0.016031 | -4.26973 |
| Prdx4         | 0.007084 | -4.92345 | 0.0113   | -4.25865 |
| Gpr137b-ps    | 0.007634 | -4.83811 | 0.011982 | -4.2494  |
| Gm10759       | 0.018683 | -4.48655 | 0.025562 | -4.22185 |
| Tet1          | 0.004149 | -4.16724 | 0.005884 | -4.22072 |
| Speer1-ps1    | 0.014294 | -2.74292 | 0.008474 | -4.20164 |
| Sifn8         | 0.003973 | -5.5814  | 0.007333 | -4.19543 |
| Ccr2          | 0.004144 | -5.06602 | 0.007264 | -4.18888 |
| Alpk1         | 0.003415 | -4.61072 | 0.004828 | -4.16975 |
| Evi5          | 0.002826 | -4.96494 | 0.004236 | -4.16501 |
| Cytip         | 0.003795 | -4.22501 | 0.004828 | -4.16107 |
| Ahnak         | 0.003889 | -5.18993 | 0.006634 | -4.13408 |
| Fam135a       | 0.005408 | -4.48052 | 0.0086   | -4.08134 |
| Slc44a1       | 0.018991 | -5.63539 | 0.038707 | -4.07409 |
| Anxa3         | 0.005339 | -4.18007 | 0.007509 | -4.06192 |
| Naaa          | 0.008949 | -4.70014 | 0.014711 | -4.05911 |

|               |          |          |          |          |
|---------------|----------|----------|----------|----------|
| Id3           | 0.00698  | -4.57047 | 0.01078  | -4.03959 |
| Tlr3          | 0.018683 | -3.91502 | 0.022466 | -3.99285 |
| Slfn5         | 0.00947  | -4.86741 | 0.016914 | -3.98925 |
| Alcam         | 0.003272 | -4.48287 | 0.004512 | -3.9864  |
| Cd33          | 0.008073 | -3.17879 | 0.007267 | -3.94696 |
| Anxa5         | 0.003272 | -4.33214 | 0.004512 | -3.93169 |
| Gatm          | 0.018989 | -3.85265 | 0.023219 | -3.90361 |
| Gpr137b       | 0.007668 | -4.70041 | 0.013688 | -3.89535 |
| Slc9a7        | 0.002755 | -4.18056 | 0.003236 | -3.85672 |
| Rasgrp3       | 0.032319 | -4.18157 | 0.046668 | -3.85016 |
| H2-Ob         | 0.006293 | -3.44141 | 0.007037 | -3.84337 |
| Myo9a         | 0.139291 | -4.04577 | 0.180805 | -3.84335 |
| Anxa1         | 0.011115 | -4.58428 | 0.019526 | -3.82873 |
| Cd180         | 0.028562 | -4.30343 | 0.043739 | -3.82788 |
| Adrbk2        | 0.014897 | -3.84802 | 0.019709 | -3.79256 |
| Tifa          | 0.012033 | -4.33731 | 0.019709 | -3.77552 |
| H2-DMa        | 0.017275 | -3.58121 | 0.020358 | -3.75258 |
| Tgm3          | 0.069336 | -3.13059 | 0.061569 | -3.7483  |
| Tet1          | 0.030063 | -3.99019 | 0.041915 | -3.73799 |
| Pld4          | 0.028735 | -4.57841 | 0.051049 | -3.72409 |
| Tlr7          | 0.021759 | -4.83558 | 0.042331 | -3.71692 |
| Gm6455        | 0.038835 | -2.39854 | 0.019619 | -3.67454 |
| Ccr5          | 0.005408 | -4.46333 | 0.009669 | -3.65801 |
| Ccr5          | 0.005408 | -4.46333 | 0.009669 | -3.65801 |
| Hpgds         | 0.028491 | -3.71292 | 0.036845 | -3.65347 |
| Birc1f        | 0.01474  | -4.14247 | 0.023222 | -3.62773 |
| Tet1          | 0.021306 | -3.84263 | 0.029938 | -3.60799 |
| Tceal1        | 0.005163 | -3.28661 | 0.006258 | -3.59017 |
| Fam49a        | 0.006468 | -3.69231 | 0.009023 | -3.57516 |
| Xlr           | 0.080286 | -3.16152 | 0.079532 | -3.55693 |
| Ifngr2        | 0.002348 | -4.20284 | 0.00316  | -3.5198  |
| 5031414D18Rik | 0.002826 | -4.21636 | 0.004468 | -3.50595 |
| Syne2         | 0.004144 | -6.08624 | 0.012042 | -3.49613 |
| Ctnnd2        | 0.003951 | -4.28368 | 0.006775 | -3.49605 |
| Il13ra1       | 0.011403 | -5.56161 | 0.029875 | -3.47974 |
| Gm6455        | 0.031394 | -2.33321 | 0.016851 | -3.45197 |
| Acvr2a        | 0.003272 | -4.31328 | 0.004927 | -3.44988 |
| Atp1b1        | 0.002818 | -5.09177 | 0.004927 | -3.43851 |
| Tagap         | 0.005249 | -2.93661 | 0.005537 | -3.42573 |
| AI451617      | 0.011115 | -3.67662 | 0.016651 | -3.42395 |
| Nrp1          | 0.008744 | -4.1097  | 0.01571  | -3.40887 |
| Gm10825       | 0.020543 | -3.5704  | 0.028211 | -3.40475 |
| Slc41a2       | 0.004144 | -4.86748 | 0.009405 | -3.40416 |
| Clec4a2       | 0.031982 | -4.34637 | 0.062522 | -3.39819 |
| Il6st         | 0.001506 | -3.68424 | 0.000899 | -3.39518 |
| Lmo2          | 0.027071 | -3.21103 | 0.030043 | -3.38696 |
| Itga1         | 0.010889 | -4.01025 | 0.019274 | -3.37381 |
| Phactr2       | 0.017213 | -3.40364 | 0.021957 | -3.36736 |
| Lrrc16a       | 0.006504 | -3.99184 | 0.011352 | -3.35025 |
| Lilrb3        | 0.016499 | -4.36833 | 0.032453 | -3.34939 |
| Zc3h12c       | 0.007387 | -3.88449 | 0.012548 | -3.3432  |
| Slc8a1        | 0.003272 | -3.29086 | 0.004015 | -3.3374  |

|               |          |          |          |          |
|---------------|----------|----------|----------|----------|
| Gm9766        | 0.008427 | -3.20472 | 0.009969 | -3.33057 |
| Opn3          | 0.006934 | -3.63795 | 0.010434 | -3.32322 |
| Myo9a         | 0.062801 | -3.29837 | 0.078049 | -3.31645 |
| Lztf11        | 0.042479 | -3.86222 | 0.071952 | -3.30559 |
| Xkrx          | 0.014696 | -4.38277 | 0.029777 | -3.30067 |
| Tgfb1         | 0.022368 | -2.86061 | 0.021664 | -3.27199 |
| Phf11         | 0.028594 | -2.97028 | 0.028959 | -3.27024 |
| Tlr1          | 0.017407 | -3.4964  | 0.024549 | -3.26533 |
| Stom          | 0.015815 | -3.496   | 0.022466 | -3.26457 |
| Pak1          | 0.041473 | -3.29842 | 0.053075 | -3.26436 |
| Clec12a       | 0.003273 | -3.63131 | 0.004828 | -3.2635  |
| Fmn12         | 0.003273 | -4.05057 | 0.005606 | -3.24265 |
| Sgpl1         | 0.003971 | -3.67188 | 0.006414 | -3.22554 |
| Dusp22        | 0.004998 | -3.91826 | 0.009209 | -3.21719 |
| Bst1          | 0.011846 | -3.14712 | 0.014837 | -3.20312 |
| Runx2         | 0.003068 | -3.78331 | 0.004558 | -3.19681 |
| Myadm         | 0.006468 | -3.90471 | 0.011998 | -3.19267 |
| Gm7609        | 0.002491 | -3.27171 | 0.002972 | -3.184   |
| Ccl9          | 0.010324 | -3.39987 | 0.015179 | -3.18364 |
| LOC625360     | 0.008361 | -3.45129 | 0.012733 | -3.16206 |
| Car2          | 0.077924 | -2.52461 | 0.058104 | -3.15914 |
| Ly6c2         | 0.008718 | -3.9723  | 0.017327 | -3.15768 |
| Fgl2          | 0.026519 | -3.36967 | 0.038202 | -3.13761 |
| Plxnb2        | 0.008528 | -3.5579  | 0.014305 | -3.13566 |
| Zeb2          | 0.013542 | -3.50539 | 0.02159  | -3.13535 |
| Mllt4         | 0.017407 | -2.29071 | 0.010424 | -3.12985 |
| Mctp2         | 0.003273 | -3.83529 | 0.005508 | -3.11978 |
| Cds1          | 0.010831 | -3.65376 | 0.019066 | -3.1136  |
| Gm6455        | 0.017048 | -2.01477 | 0.007269 | -3.1117  |
| Ly6d          | 0.001506 | -3.10426 | 0.001504 | -3.10515 |
| Bcl6          | 0.010464 | -3.22686 | 0.014766 | -3.09441 |
| Sirpa         | 0.033089 | -3.96265 | 0.066691 | -3.09365 |
| BC013712      | 0.003273 | -3.3181  | 0.004512 | -3.09339 |
| Naip5         | 0.013421 | -4.03539 | 0.027197 | -3.09068 |
| Samhd1        | 0.016217 | -3.18557 | 0.022193 | -3.0492  |
| Myo9a         | 0.019857 | -3.2777  | 0.028838 | -3.04452 |
| Bclp2         | 0.046465 | -2.90529 | 0.054216 | -3.01248 |
| Ctnna1        | 0.003272 | -3.45483 | 0.004719 | -3.00523 |
| Hck           | 0.002818 | -3.39895 | 0.004138 | -3.0042  |
| Dock4         | 0.004519 | -3.45042 | 0.007899 | -3.0036  |
| Hp            | 0.021168 | -3.25391 | 0.03132  | -3.00334 |
| Rgs10         | 0.003889 | -3.56927 | 0.006634 | -2.99495 |
| Tcf4          | 0.003272 | -3.55898 | 0.004831 | -2.99476 |
| Myo9a         | 0.008073 | -3.24377 | 0.012106 | -2.98663 |
| Sp140         | 0.026342 | -3.85331 | 0.054713 | -2.97868 |
| Plekha3       | 0.002044 | -3.77711 | 0.002972 | -2.96878 |
| Pira3         | 0.008877 | -4.11706 | 0.021065 | -2.96824 |
| Fam105a       | 0.004721 | -3.10383 | 0.007037 | -2.95853 |
| 6330407A03Rik | 0.055182 | -2.96797 | 0.071043 | -2.94431 |
| Lyn           | 0.002638 | -3.10355 | 0.002972 | -2.93362 |
| Ccdc88a       | 0.014287 | -3.48546 | 0.02506  | -2.93298 |
| Fgd4          | 0.012079 | -3.33301 | 0.020595 | -2.9283  |

|               |          |          |          |          |
|---------------|----------|----------|----------|----------|
| EG665955      | 0.058056 | -2.47279 | 0.048636 | -2.91598 |
| Pros1         | 0.028294 | -4.08619 | 0.068644 | -2.91514 |
| B4galt6       | 0.022185 | -2.72175 | 0.023963 | -2.91456 |
| Zfp36         | 0.003579 | -2.95884 | 0.004745 | -2.91152 |
| A530040E14Rik | 0.00461  | -3.6706  | 0.00917  | -2.90236 |
| Myo1f         | 0.011115 | -3.13927 | 0.017172 | -2.89816 |
| AY512938      | 0.017788 | -3.22302 | 0.027365 | -2.89768 |
| Cd52          | 0.024431 | -3.24056 | 0.039072 | -2.88981 |
| Tmem50b       | 0.007765 | -2.83907 | 0.009572 | -2.88194 |
| Cox6a2        | 0.004633 | -3.03853 | 0.007037 | -2.87246 |
| Rab32         | 0.018322 | -3.12572 | 0.027051 | -2.87243 |
| Cc2d2a        | 0.154998 | -1.51868 | 0.022881 | -2.8705  |
| A530040E14Rik | 0.033637 | -3.8476  | 0.075763 | -2.86734 |
| Grn           | 0.003949 | -3.28353 | 0.006414 | -2.84839 |
| Cd34          | 0.024196 | -2.34643 | 0.019619 | -2.83928 |
| Vwa5a         | 0.003966 | -3.00488 | 0.00561  | -2.8389  |
| Adora3        | 0.005408 | -3.06458 | 0.008683 | -2.83289 |
| Mef2a         | 0.003272 | -2.8434  | 0.004015 | -2.82994 |
| Pip4k2a       | 0.004144 | -2.75322 | 0.00561  | -2.80284 |
| Tet2          | 0.002818 | -3.13212 | 0.004015 | -2.80145 |
| Syne2         | 0.00318  | -4.7624  | 0.007509 | -2.79447 |
| Gpr183        | 0.012638 | -3.10694 | 0.020617 | -2.78912 |
| Ccnd1         | 0.011431 | -2.98879 | 0.017599 | -2.78649 |
| A530023O14Rik | 0.004144 | -2.66025 | 0.005327 | -2.78599 |
| Arid5b        | 0.003798 | -3.00795 | 0.005537 | -2.7735  |
| Tmem224       | 0.008695 | -3.1391  | 0.014711 | -2.76846 |
| Havcr2        | 0.007573 | -3.115   | 0.012632 | -2.76215 |
| Gm2a          | 0.004878 | -2.46587 | 0.005427 | -2.74955 |
| Pik3ap1       | 0.005256 | -2.98508 | 0.008553 | -2.74803 |
| Pik3c2a       | 0.005288 | -2.86522 | 0.008018 | -2.74014 |
| Unc93b1       | 0.003272 | -2.78919 | 0.004202 | -2.73784 |
| Zc3h12c       | 0.005659 | -3.11446 | 0.009669 | -2.73353 |
| Asah1         | 0.010589 | -2.91182 | 0.015783 | -2.73262 |
| Gcnt2         | 0.007313 | -2.50357 | 0.008087 | -2.73227 |
| Arhgef12      | 0.007511 | -3.36202 | 0.015283 | -2.71828 |
| A030009H04Rik | 0.002348 | -2.90591 | 0.002972 | -2.71553 |
| Tceal8        | 0.012516 | -2.71384 | 0.016359 | -2.71046 |
| Cst3          | 0.010432 | -2.89285 | 0.01571  | -2.70141 |
| Lsp1          | 0.005063 | -2.77221 | 0.007264 | -2.69996 |
| Mobkl2b       | 0.052746 | -3.00921 | 0.085365 | -2.69286 |
| A530040E14Rik | 0.037591 | -3.69434 | 0.090663 | -2.68538 |
| Blnk          | 0.00947  | -4.09852 | 0.027012 | -2.68514 |
| Ela2          | 0.034614 | -2.71216 | 0.044142 | -2.68383 |
| Ggh           | 0.018991 | -2.91635 | 0.028711 | -2.6836  |
| Itgb2         | 0.004898 | -2.7059  | 0.006803 | -2.67768 |
| Sgms1         | 0.018991 | -2.49076 | 0.020784 | -2.67271 |
| Klrb1f        | 0.004144 | -3.4359  | 0.008683 | -2.66765 |
| Rgl1          | 0.003793 | -3.15257 | 0.006343 | -2.66556 |
| Sp140         | 0.008695 | -3.3056  | 0.01823  | -2.65738 |
| Ly6c1         | 0.02463  | -3.45069 | 0.055021 | -2.65431 |
| Dnajb14       | 0.007313 | -3.49144 | 0.017172 | -2.64783 |
| Dnase1l1      | 0.017407 | -3.05358 | 0.029637 | -2.64321 |

|               |          |          |          |          |
|---------------|----------|----------|----------|----------|
| Ap1s2         | 0.022368 | -2.98021 | 0.037326 | -2.64315 |
| Itgam         | 0.053551 | -2.65347 | 0.068644 | -2.64068 |
| Eepd1         | 0.006015 | -2.95588 | 0.010048 | -2.62803 |
| Fam55a        | 0.028005 | -3.14465 | 0.052952 | -2.62564 |
| Gm9733        | 0.043995 | -4.43351 | 0.147784 | -2.62553 |
| Skap2         | 0.005648 | -2.77114 | 0.008683 | -2.61226 |
| Gsdmd         | 0.020507 | -2.75432 | 0.02938  | -2.60355 |
| Cfp           | 0.012079 | -2.86736 | 0.019709 | -2.60201 |
| Pln           | 0.052658 | -2.25028 | 0.044502 | -2.60068 |
| Tmem176b      | 0.008075 | -2.59973 | 0.010424 | -2.58074 |
| Hgf           | 0.034128 | -2.02709 | 0.021664 | -2.57983 |
| Ppm1k         | 0.020359 | -2.71912 | 0.028838 | -2.57715 |
| Trem3         | 0.035118 | -2.63778 | 0.046668 | -2.57626 |
| Camsap1l1     | 0.003273 | -2.69635 | 0.004585 | -2.56938 |
| Abcb1b        | 0.018894 | -2.5155  | 0.022414 | -2.5646  |
| Zfp677        | 0.043542 | -2.68382 | 0.062198 | -2.56236 |
| Nlrp3         | 0.007369 | -2.50125 | 0.009098 | -2.56223 |
| Parp8         | 0.002146 | -2.67684 | 0.002869 | -2.56192 |
| Slc46a3       | 0.035496 | -2.91315 | 0.061829 | -2.54691 |
| Lpcat2        | 0.037338 | -2.32991 | 0.036538 | -2.54537 |
| Camk1d        | 0.005688 | -2.91954 | 0.010244 | -2.53895 |
| Txndc16       | 0.011506 | -3.06007 | 0.022361 | -2.53869 |
| 3830403N18Rik | 0.154984 | -2.65118 | 0.201976 | -2.53622 |
| Dennd5a       | 0.008115 | -2.51281 | 0.010099 | -2.53272 |
| Sh2d1b1       | 0.064024 | -2.81547 | 0.101747 | -2.53172 |
| Setbp1        | 0.00461  | -3.77882 | 0.013712 | -2.5238  |
| Nek6          | 0.006468 | -2.48693 | 0.008512 | -2.51941 |
| Ppp2r5c       | 0.061779 | -2.91456 | 0.108266 | -2.51186 |
| Myo9a         | 0.110573 | -2.64866 | 0.150197 | -2.51017 |
| Clec4a1       | 0.06775  | -3.36155 | 0.152763 | -2.5081  |
| Il1r2         | 0.244902 | -2.00491 | 0.174072 | -2.50633 |
| Ifi27l2a      | 0.017407 | -3.13841 | 0.036418 | -2.50223 |
| Zeb2          | 0.004757 | -3.03141 | 0.009405 | -2.49526 |
| Snx9          | 0.004144 | -2.58277 | 0.006343 | -2.4769  |
| Hist1h2bc     | 0.031187 | -3.15858 | 0.069659 | -2.47272 |
| Lpcat1        | 0.006665 | -2.50679 | 0.009023 | -2.46868 |
| Lipa          | 0.022099 | -2.55063 | 0.0301   | -2.46375 |
| Gramd3        | 0.012827 | -2.37201 | 0.014934 | -2.46355 |
| Slc44a1       | 0.006468 | -3.81219 | 0.021065 | -2.46223 |
| Pgcp          | 0.017048 | -2.6951  | 0.026587 | -2.46209 |
| Rtn1          | 0.02295  | -2.99996 | 0.046794 | -2.45617 |
| Gm14005       | 0.04514  | -2.28062 | 0.046535 | -2.45606 |
| Net1          | 0.003579 | -2.66986 | 0.005361 | -2.44849 |
| Pja1          | 0.003273 | -2.48028 | 0.004512 | -2.44563 |
| 5033414K04Rik | 0.006137 | -2.9068  | 0.011996 | -2.44006 |
| Tnni2         | 0.009664 | -2.58137 | 0.014627 | -2.43893 |
| Ppp2r5c       | 0.01387  | -2.93747 | 0.026773 | -2.43783 |
| Itgae         | 0.05613  | -2.2474  | 0.056409 | -2.43415 |
| Atp7a         | 0.003966 | -2.77382 | 0.006775 | -2.426   |
| Igsf6         | 0.021997 | -2.72272 | 0.037235 | -2.4258  |
| Depdc7        | 0.059216 | -2.76294 | 0.101546 | -2.42324 |
| Myo9a         | 0.021997 | -2.70507 | 0.037401 | -2.40888 |



|               |          |          |          |          |
|---------------|----------|----------|----------|----------|
| Tiparp        | 0.00912  | -2.57423 | 0.014305 | -2.40506 |
| Cd53          | 0.01089  | -2.43294 | 0.014711 | -2.39865 |
| Spp1          | 0.039483 | -2.33086 | 0.04573  | -2.39663 |
| Atp2b4        | 0.019125 | -2.46361 | 0.026031 | -2.39588 |
| Ctnnd1        | 0.009821 | -2.16542 | 0.009405 | -2.39298 |
| Plek          | 0.016683 | -2.67307 | 0.027401 | -2.38224 |
| Chi3l3        | 0.123789 | -2.86072 | 0.217586 | -2.36477 |
| Myo9a         | 0.189365 | -2.32603 | 0.214975 | -2.36398 |
| Dhrs7         | 0.00872  | -3.15425 | 0.021664 | -2.36089 |
| Myo9a         | 0.022796 | -2.65759 | 0.039286 | -2.35656 |
| Tubb2a        | 0.011115 | -2.55191 | 0.01823  | -2.35428 |
| Inpp4a        | 0.009413 | -2.86136 | 0.019619 | -2.35269 |
| Hist2h2be     | 0.005659 | -3.05376 | 0.014305 | -2.34434 |
| Lrrtm2        | 0.044764 | -2.55489 | 0.071807 | -2.34133 |
| Rgs2          | 0.011115 | -2.39068 | 0.015244 | -2.34067 |
| Snx24         | 0.023133 | -2.57233 | 0.037798 | -2.33393 |
| Tubgcp5       | 0.008877 | -3.1233  | 0.022321 | -2.33153 |
| Cask          | 0.010322 | -2.66335 | 0.018981 | -2.32927 |
| 4930420K17Rik | 0.01913  | -2.42247 | 0.027051 | -2.31823 |
| Hdac9         | 0.00533  | -3.26373 | 0.015434 | -2.31551 |
| Hepacam2      | 0.047563 | -3.30972 | 0.134464 | -2.31478 |
| Ctbs          | 0.027071 | -2.54119 | 0.043739 | -2.31153 |
| Atg4c         | 0.045462 | -2.18179 | 0.048371 | -2.31084 |
| Fam174a       | 0.003273 | -2.63053 | 0.005327 | -2.30382 |
| Gm10708       | 0.043667 | -2.28338 | 0.054002 | -2.30173 |
| Abcg3         | 0.05938  | -1.84622 | 0.036395 | -2.29012 |
| Clec4b2       | 0.022196 | -2.77147 | 0.046243 | -2.28893 |
| A930001N09Rik | 0.013226 | -2.3334  | 0.018274 | -2.2868  |
| Skil          | 0.011851 | -2.52339 | 0.020025 | -2.28676 |
| Ttpa          | 0.173895 | -1.88699 | 0.124154 | -2.28297 |
| Cd22          | 0.049466 | -2.24046 | 0.060045 | -2.27899 |
| Raph1         | 0.008427 | -3.56151 | 0.028773 | -2.27842 |
| 9030617O03Rik | 0.019587 | -2.15544 | 0.021631 | -2.27468 |
| Stx7          | 0.002818 | -2.55495 | 0.004236 | -2.27019 |
| Gapt          | 0.021997 | -2.63517 | 0.041632 | -2.26586 |
| Mtm1          | 0.006345 | -2.45248 | 0.010048 | -2.26447 |
| Eif2c4        | 0.005408 | -2.64977 | 0.010452 | -2.26326 |
| Tbc1d9        | 0.024007 | -2.20907 | 0.027921 | -2.25719 |
| Ly96          | 0.060142 | -2.50422 | 0.099214 | -2.25287 |
| Itpr1         | 0.003415 | -2.50152 | 0.005361 | -2.25251 |
| Lztf1l        | 0.011587 | -2.42049 | 0.018594 | -2.25239 |
| Ap1s3         | 0.005473 | -2.27241 | 0.007721 | -2.25186 |
| B3gnt5        | 0.043904 | -2.19284 | 0.051774 | -2.24496 |
| Tifab         | 0.058976 | -2.6749  | 0.115697 | -2.2391  |
| Bcl2a1c       | 0.014376 | -2.3524  | 0.021247 | -2.23816 |
| Sor1          | 0.008115 | -2.51909 | 0.014711 | -2.23397 |
| Prtn3         | 0.027316 | -2.31057 | 0.037857 | -2.23026 |
| 3110043O21Rik | 0.005648 | -2.25119 | 0.007948 | -2.23019 |
| Cd44          | 0.012079 | -2.13021 | 0.013967 | -2.22992 |
| Ero1lb        | 0.011057 | -2.58214 | 0.02115  | -2.22875 |
| Met           | 0.02249  | -2.46002 | 0.037514 | -2.22869 |
| Meis1         | 0.010601 | -1.97629 | 0.00939  | -2.22677 |

|               |          |          |          |          |
|---------------|----------|----------|----------|----------|
| Pftk1         | 0.027728 | -2.69696 | 0.058909 | -2.22149 |
| Sirpb1        | 0.049807 | -2.93036 | 0.124209 | -2.21679 |
| A530032D15Rik | 0.036256 | -2.99687 | 0.096674 | -2.21603 |
| Zfp229        | 0.075248 | -2.33888 | 0.107985 | -2.21498 |
| Myo9a         | 0.005913 | -2.45424 | 0.010048 | -2.2146  |
| Il18rap       | 0.085214 | -1.99604 | 0.076677 | -2.21375 |
| Trim30        | 0.013421 | -2.29105 | 0.01928  | -2.20982 |
| Rufy1         | 0.008035 | -2.41096 | 0.013262 | -2.20692 |
| Ncf1          | 0.031983 | -2.37103 | 0.049469 | -2.20084 |
| Tcf7l2        | 0.011846 | -1.91294 | 0.009583 | -2.19763 |
| Cd300lf       | 0.004144 | -1.99508 | 0.004585 | -2.19725 |
| Xist          | 0.908466 | 1.94981  | 0.897825 | -2.19583 |
| Ly6a          | 0.043821 | -2.58801 | 0.086908 | -2.19326 |
| Ciita         | 0.023059 | -2.38695 | 0.037106 | -2.19307 |
| Lyst          | 0.004633 | -2.48203 | 0.008616 | -2.19231 |
| Ctsb          | 0.003793 | -2.51919 | 0.006343 | -2.19175 |
| Cx3cr1        | 0.0174   | -2.25579 | 0.023436 | -2.19122 |
| Ccr9          | 0.039479 | -3.4137  | 0.137524 | -2.19115 |
| Glpr1         | 0.021997 | -2.22748 | 0.028838 | -2.19046 |
| Emb           | 0.011772 | -2.2619  | 0.017025 | -2.18863 |
| Klf6          | 0.003889 | -2.4037  | 0.006258 | -2.1865  |
| Nlrc4         | 0.024314 | -2.52062 | 0.045557 | -2.18521 |
| Sgk3          | 0.007033 | -2.32788 | 0.010755 | -2.18504 |
| Lair1         | 0.014287 | -2.30315 | 0.021247 | -2.18473 |
| Cd8a          | 0.026014 | -2.039   | 0.026156 | -2.18454 |
| Fam69a        | 0.009475 | -2.49088 | 0.017869 | -2.18309 |
| Mfsd6         | 0.010863 | -2.35776 | 0.01773  | -2.1813  |
| Ifnar2        | 0.00459  | -2.31102 | 0.007264 | -2.1733  |
| Il1b          | 0.047125 | -3.08025 | 0.13807  | -2.17271 |
| Ifi30         | 0.024431 | -3.22531 | 0.082254 | -2.1725  |
| Tmeff1        | 0.02137  | -2.48093 | 0.039533 | -2.16843 |
| Gm10033       | 0.040854 | -1.81127 | 0.027051 | -2.16672 |
| H2-Oa         | 0.022514 | -2.24172 | 0.03147  | -2.1616  |
| Ccdc90b       | 0.017393 | -2.13781 | 0.021421 | -2.16071 |
| Ptk2          | 0.010085 | -2.49756 | 0.019619 | -2.16011 |
| Tmem71        | 0.017407 | -2.13219 | 0.021416 | -2.15748 |
| Epb4.1l3      | 0.040574 | -1.7106  | 0.021772 | -2.15587 |
| Bcl11a        | 0.070838 | -2.10622 | 0.082556 | -2.154   |
| B3gnt3        | 0.443073 | -1.22087 | 0.043872 | -2.15397 |
| Capn2         | 0.005154 | -2.72151 | 0.012106 | -2.15209 |
| Rgs18         | 0.074695 | -2.16816 | 0.09473  | -2.14997 |
| 6330442E10Rik | 0.015531 | -2.29422 | 0.023267 | -2.14796 |
| Sfpi1         | 0.056473 | -2.08323 | 0.064902 | -2.14643 |
| Il18          | 0.013535 | -2.58102 | 0.02759  | -2.14359 |
| Serpina12     | 0.182707 | -1.53084 | 0.063726 | -2.14222 |
| 9230105E10Rik | 0.023629 | -2.00682 | 0.024144 | -2.13623 |
| Hoxa5         | 0.005256 | -2.1122  | 0.007037 | -2.13616 |
| Gng2          | 0.002818 | -2.49495 | 0.004512 | -2.13337 |
| Cysl1r1       | 0.039483 | -2.59769 | 0.086043 | -2.12983 |
| St8sia4       | 0.004334 | -2.51092 | 0.009    | -2.12781 |
| Ptprj         | 0.003422 | -2.49265 | 0.006258 | -2.12524 |
| Ssh2          | 0.300707 | -1.88875 | 0.26682  | -2.12112 |

|               |          |          |          |          |
|---------------|----------|----------|----------|----------|
| 1700010114Rik | 0.024431 | -2.09074 | 0.028864 | -2.12096 |
| Usp12         | 0.019242 | -2.09373 | 0.023436 | -2.11902 |
| Tlr2          | 0.021706 | -2.6856  | 0.053127 | -2.11662 |
| Cacna1e       | 0.021293 | -2.45825 | 0.041632 | -2.11519 |
| Ms4a6d        | 0.023202 | -2.52453 | 0.048522 | -2.11423 |
| Slc37a3       | 0.152733 | -1.83765 | 0.120628 | -2.11369 |
| Emr1          | 0.057589 | -2.83011 | 0.148945 | -2.1133  |
| Ncoa1         | 0.003793 | -2.58723 | 0.007269 | -2.11289 |
| Kctd14        | 0.014828 | -2.3192  | 0.024357 | -2.11003 |
| Ifi203        | 0.011794 | -2.34477 | 0.020816 | -2.1075  |
| Alpk1         | 0.019857 | -2.4115  | 0.037298 | -2.10436 |
| Mx2           | 0.016976 | -2.68463 | 0.040958 | -2.1033  |
| Gm6455        | 0.375376 | -1.39353 | 0.109488 | -2.09854 |
| Clec5a        | 0.060611 | -2.16285 | 0.083815 | -2.09812 |
| Cd68          | 0.010891 | -2.31654 | 0.019066 | -2.09712 |
| Evi2a         | 0.013963 | -2.42595 | 0.026666 | -2.09326 |
| D1Ert622e     | 0.005249 | -2.29367 | 0.009023 | -2.09211 |
| Myo9a         | 0.024007 | -2.50056 | 0.050685 | -2.08875 |
| Rbm47         | 0.013298 | -2.33635 | 0.023123 | -2.08807 |
| Nostrin       | 0.021818 | -2.80364 | 0.062387 | -2.08626 |
| Hmgn3         | 0.016421 | -2.74047 | 0.043124 | -2.08298 |
| Nsmf          | 0.007211 | -2.38894 | 0.014305 | -2.07672 |
| Hexa          | 0.011826 | -2.34523 | 0.021664 | -2.07535 |
| Ifi204        | 0.062104 | -2.50479 | 0.130837 | -2.06599 |
| Srgap3        | 0.004023 | -2.70757 | 0.009669 | -2.06559 |
| Lgals3        | 0.015468 | -2.5131  | 0.033485 | -2.06489 |
| Ms4a4b        | 0.024123 | -2.08866 | 0.031359 | -2.05829 |
| Prcp          | 0.026215 | -2.1637  | 0.038861 | -2.05037 |
| Chd7          | 0.2629   | -2.17545 | 0.334791 | -2.05027 |
| Kif1c         | 0.027071 | -2.25257 | 0.045412 | -2.05005 |
| Clec4a3       | 0.050762 | -3.40871 | 0.200589 | -2.04829 |
| Gm1966        | 0.014696 | -2.34606 | 0.027197 | -2.04804 |
| Slc36a4       | 0.032181 | -2.41381 | 0.066574 | -2.046   |
| Slc9a2        | 0.056999 | -1.69922 | 0.035562 | -2.04159 |
| Tyrobp        | 0.039955 | -2.07164 | 0.053127 | -2.03537 |
| Ssbp2         | 0.017549 | -2.0847  | 0.023493 | -2.03429 |
| Thbs1         | 0.12524  | -1.74414 | 0.090292 | -2.03353 |
| F13a1         | 0.121799 | -2.48127 | 0.233422 | -2.03318 |
| Leprel1       | 0.055438 | -2.3881  | 0.111057 | -2.0314  |
| Sirpb1        | 0.057325 | -3.5485  | 0.23601  | -2.03038 |
| Malt1         | 0.004085 | -2.23    | 0.006803 | -2.0297  |
| Tpd52         | 0.008073 | -2.06385 | 0.01078  | -2.02969 |
| Cybasc3       | 0.013542 | -2.21793 | 0.022361 | -2.02935 |
| Otud1         | 0.010123 | -2.4137  | 0.021664 | -2.02892 |
| Bex6          | 0.024414 | -2.12771 | 0.036045 | -2.0278  |
| Scp2          | 0.01931  | -1.94898 | 0.021664 | -2.02724 |
| Arhgap17      | 0.003795 | -2.27149 | 0.006343 | -2.02578 |
| Slc8a1        | 0.017788 | -2.23679 | 0.02966  | -2.02576 |
| Dap           | 0.003972 | -2.26617 | 0.007037 | -2.02274 |
| Fcgrt         | 0.018091 | -2.21658 | 0.02966  | -2.01907 |
| Amica1        | 0.011826 | -2.46832 | 0.026767 | -2.01773 |
| Ptafr         | 0.013181 | -2.08675 | 0.019066 | -2.01713 |

|          |          |          |          |          |
|----------|----------|----------|----------|----------|
| Abcg2    | 0.019679 | -1.997   | 0.023883 | -2.01678 |
| Ext1     | 0.011019 | -2.07243 | 0.015571 | -2.01646 |
| Cxcr6    | 0.053286 | -1.97607 | 0.063195 | -2.01568 |
| Stambpl1 | 0.009739 | -2.73376 | 0.028461 | -2.00778 |
| Gm16485  | 0.365729 | -1.28935 | 0.065551 | -2.00753 |
| Nfam1    | 0.018599 | -2.20361 | 0.030648 | -2.00413 |
| Rfx3     | 0.013148 | -1.9598  | 0.01571  | -2.00087 |
| Gpr155   | 0.00636  | -2.93233 | 0.022361 | -2.00015 |

### Supplementary Table 3

Genes greater than 2 fold in Tcf1-expressing Thy1+CD25+ cells compared to LMPP

|               | Tcf1-T #1 | Tcf1-T #2 | Control T |
|---------------|-----------|-----------|-----------|
| Il2ra         | 65.283    | 69.065    | 107.971   |
| Vcan          | 32.204    | 34.1385   | 7.33422   |
| H19           | 26.6931   | 36.2334   | 46.354    |
| Rhoj          | 20.4504   | 24.5748   | 1.47782   |
| Rtp4          | 19.983    | 15.7754   | 10.5209   |
| Thy1          | 19.1157   | 21.1487   | 28.9079   |
| Emr1          | 18.4886   | 23.2033   | -1.30611  |
| Rasgrp1       | 17.288    | 21.0993   | 35.2508   |
| 5830411N06Rik | 17.0945   | 14.8446   | 6.68864   |
| Oas2          | 15.9546   | 10.1037   | 2.81029   |
| F13a1         | 14.9875   | 13.9541   | -1.13182  |
| Scd1          | 13.3469   | 13.6089   | 16.5024   |
| Fam169b       | 12.4249   | 14.6434   | 22.8443   |
| Timp3         | 11.6773   | 15.4166   | 12.8501   |
| Psg17         | 11.6153   | 17.5169   | 24.1252   |
| Akr1c12       | 11.1967   | 16.7621   | 21.473    |
| Ms4a6b        | 10.9599   | 11.3238   | 12.1852   |
| Naip3         | 10.4559   | 9.8625    | 10.3127   |
| Ms4a4c        | 10.119    | 11.011    | -1.34616  |
| Airn          | 10.099    | 9.44785   | 4.62513   |
| Papss2        | 9.99026   | 16.8368   | 2.25266   |
| Tcrg-V3       | 9.95008   | 9.32138   | 9.62186   |
| Txk           | 9.72213   | 12.9856   | 25.8943   |
| Oasl2         | 9.68444   | 7.8505    | 5.1575    |
| Thbs1         | 8.85777   | 8.554     | 5.83157   |
| Enah          | 8.75945   | 10.0197   | 6.21857   |
| Tgfb1         | 8.16825   | 8.80004   | -1.42278  |
| Itk           | 8.03243   | 8.88859   | 9.77184   |
| Ms4a6d        | 8.0229    | 8.72292   | -1.90007  |
| Ddx58         | 7.74671   | 7.02716   | 5.30975   |
| Ccdc109b      | 7.4994    | 10.3707   | 14.8351   |
| Slfn5         | 7.27791   | 7.48454   | 4.17685   |
| Il7r          | 7.13921   | 8.35661   | 4.74067   |
| A630038E17Rik | 6.66874   | 8.19594   | 12.5983   |
| Fam40b        | 6.55424   | 9.42944   | 15.3104   |
| Gprin3        | 6.48236   | 8.5229    | 9.9285    |
| Cysl1r1       | 6.3872    | 7.27103   | 5.97907   |
| Nov           | 6.27173   | 8.65576   | 2.0479    |
| Al607873      | 6.01243   | 6.62683   | 1.60898   |
| Stxbp6        | 5.93694   | 7.98734   | 7.77169   |
| Mmp8          | 5.90958   | 5.67496   | -5.47615  |
| Ceacam15      | 5.85764   | 10.7496   | -1.00674  |
| Trat1         | 5.79019   | 7.16032   | 45.4621   |
| Clec4a3       | 5.77912   | 9.04737   | -1.15204  |
| EG634650      | 5.7681    | 7.19231   | 15.035    |
| Mpa2l         | 5.70952   | 6.26533   | 12.9143   |
| AB124611      | 5.70889   | 7.03539   | 5.17523   |
| Vat1l         | 5.70762   | 8.65018   | 11.3038   |

|               |         |         |          |
|---------------|---------|---------|----------|
| A130014H13Rik | 5.53268 | 3.79705 | 15.151   |
| Oas1g         | 5.5151  | 4.54253 | 1.04017  |
| Usp18         | 5.47096 | 4.68466 | 1.69098  |
| Pde3b         | 5.40693 | 6.11325 | 4.54786  |
| Mgl2          | 5.3162  | 4.80712 | -3.38478 |
| Mgst2         | 5.28637 | 4.77588 | 5.85711  |
| Prkca         | 5.27485 | 6.76225 | 11.8579  |
| Ms4a4b        | 5.26066 | 6.431   | 3.17501  |
| Gata3         | 5.16616 | 6.5222  | 14.275   |
| Clec4a1       | 5.12594 | 10.8144 | -1.2246  |
| Oas1b         | 5.06925 | 4.26269 | 3.61015  |
| Akr1c13       | 5.06322 | 6.33518 | 9.96927  |
| Ifit1         | 5.04806 | 3.76882 | 1.79015  |
| Kbtbd11       | 4.88941 | 6.09583 | 17.9218  |
| Ncam2         | 4.81527 | 7.48494 | 1.22177  |
| Plxdc2        | 4.71542 | 6.03838 | 7.10578  |
| Cpa3          | 4.66979 | 5.64662 | 9.22892  |
| Dhx58         | 4.6221  | 4.28646 | 5.29429  |
| Fam20a        | 4.60045 | 6.78821 | 45.7916  |
| Pde2a         | 4.53628 | 5.81654 | 3.71881  |
| Ccr4          | 4.45242 | 6.3647  | 12.6645  |
| Nck2          | 4.41682 | 5.72714 | 12.637   |
| Parp12        | 4.41    | 4.16855 | 2.97505  |
| Nck2          | 4.39988 | 4.79517 | 8.8353   |
| Gm13926       | 4.38441 | 4.56013 | 4.43228  |
| Gm13926       | 4.38441 | 4.56013 | 4.43228  |
| Xaf1          | 4.38393 | 3.75306 | 2.88889  |
| Pdcd1         | 4.35563 | 4.85336 | 1.64898  |
| P2ry10        | 4.28736 | 5.5601  | 9.69578  |
| Tgtp          | 4.24791 | 4.10055 | 7.70997  |
| Xkrx          | 4.23521 | 6.84851 | 1.87873  |
| Sla2          | 4.16    | 5.33141 | 4.87248  |
| Pyhin1        | 4.14375 | 5.40158 | 2.09191  |
| Rasgrp3       | 4.11607 | 5.63549 | -1.48819 |
| Irf7          | 4.1122  | 3.81988 | 2.57636  |
| Gvin1         | 4.04883 | 3.69569 | 2.93201  |
| Ifi2711       | 4.02135 | 4.29508 | 2.12873  |
| Tlr8          | 4.01948 | 4.06954 | -1.09962 |
| E030037K03Rik | 4.01243 | 4.70614 | 2.03655  |
| Ifi44         | 3.99436 | 5.28932 | 1.85409  |
| Ms4a6c        | 3.98165 | 3.48087 | -3.4711  |
| I830127L07Rik | 3.96439 | 4.2602  | -5.01406 |
| Igf2r         | 3.95289 | 4.54002 | 3.28247  |
| Bcl11b        | 3.94668 | 4.51171 | 7.26869  |
| Slamf1        | 3.94361 | 5.72016 | 3.58777  |
| Tnfrsf9       | 3.92113 | 5.93165 | 2.38741  |
| Tgtp          | 3.85268 | 3.71398 | 7.12675  |
| Lyz2          | 3.81845 | 5.09709 | -3.87077 |
| H19           | 3.79615 | 6.03294 | 6.5614   |
| Tgfbr3        | 3.7951  | 4.01881 | 4.23876  |
| Mov10         | 3.76182 | 3.89481 | 3.57263  |
| Epsti1        | 3.72237 | 4.45143 | 6.12516  |

|          |         |         |          |
|----------|---------|---------|----------|
| Bgn      | 3.71557 | 6.10564 | 1.66414  |
| Grap2    | 3.60224 | 4.1206  | 7.7657   |
| Ctla4    | 3.59217 | 4.71656 | 33.6475  |
| Ppargc1a | 3.57943 | 5.21428 | 1.19033  |
| Ii17rb   | 3.57519 | 4.0946  | 15.4532  |
| Tcn2     | 3.56495 | 3.78647 | 2.19513  |
| Mfsd2    | 3.56058 | 3.95492 | 6.47424  |
| Socs2    | 3.55823 | 4.06481 | 2.62153  |
| Gzmb     | 3.54473 | 5.80707 | 5.24799  |
| Ly6a     | 3.49779 | 2.95369 | 2.35028  |
| Gbp4     | 3.48065 | 4.38875 | 10.0336  |
| Ccl22    | 3.47788 | 6.83311 | -3.08197 |
| Gpr114   | 3.47442 | 4.36041 | 6.46593  |
| Ets1     | 3.47434 | 4.27679 | 10.2491  |
| Trim30   | 3.47329 | 3.04261 | 2.36157  |
| Sirpb1   | 3.46106 | 4.85559 | -1.08533 |
| Gp49a    | 3.38967 | 4.18117 | 2.78646  |
| Actr3b   | 3.33796 | 5.28524 | 9.94183  |
| Ccl5     | 3.33718 | 5.65498 | 1.14175  |
| Ap1s2    | 3.30202 | 4.2101  | -1.74432 |
| Rnf213   | 3.29799 | 2.71438 | 1.52682  |
| Prnp     | 3.26849 | 4.40002 | 1.89597  |
| Saa3     | 3.26098 | 7.01476 | -1.42893 |
| Igf2     | 3.25689 | 5.38964 | 14.5674  |
| Samd9l   | 3.24364 | 3.32221 | 1.09309  |
| Cd163l1  | 3.24084 | 3.28679 | 13.255   |
| Isg20    | 3.20624 | 3.63903 | 3.56453  |
| Cxcr5    | 3.18765 | 5.42269 | 14.1785  |
| Map3k8   | 3.17208 | 3.86416 | 5.03393  |
| Sipa111  | 3.16333 | 3.45906 | 2.24457  |
| Ifi27l2a | 3.15138 | 2.92347 | 1.06244  |
| Ms4a4a   | 3.1312  | 4.6821  | -1.22057 |
| Ifi204   | 3.11573 | 3.03863 | 6.70827  |
| Ffar2    | 3.11187 | 3.94009 | 1.17369  |
| Zfp760   | 3.10535 | 4.35887 | 1.54049  |
| Mgl1     | 3.0904  | 3.26787 | -1.98664 |
| Fscn1    | 3.07048 | 6.3335  | -1.05035 |
| C1qtnf1  | 3.06806 | 4.06009 | 6.67316  |
| Ddx60    | 3.00533 | 2.61646 | 1.23348  |
| Igf1     | 3.00293 | 5.05656 | -1.09199 |
| Airn     | 2.97875 | 3.0849  | 1.96509  |
| Stk39    | 2.97435 | 3.61323 | 5.80791  |
| Lilrb4   | 2.97183 | 3.23498 | 2.32116  |
| Gm4951   | 2.96681 | 2.20468 | 2.06748  |
| Fbxo30   | 2.9611  | 3.57463 | 4.66243  |
| Gm10838  | 2.9528  | 2.76561 | 5.61497  |
| Ptpn1    | 2.94113 | 3.25663 | 2.10102  |
| Fyb      | 2.93241 | 3.5767  | 6.14446  |
| Gm6683   | 2.9301  | 4.00034 | 15.949   |
| Ppargc1a | 2.92024 | 4.33806 | 1.12951  |
| Fut8     | 2.91025 | 3.10799 | 3.0106   |
| Socs2    | 2.89024 | 3.34723 | 2.50197  |

|               |         |         |          |
|---------------|---------|---------|----------|
| Rras2         | 2.88416 | 3.33484 | 6.58337  |
| Snora61       | 2.86469 | 2.21891 | 2.39015  |
| Il2rb         | 2.85424 | 4.08673 | 1.75382  |
| Lef1          | 2.8473  | 3.95988 | 12.6548  |
| Ift80         | 2.82519 | 3.54569 | 7.14108  |
| Rsad2         | 2.82318 | 2.32366 | 1.61626  |
| Gpmb          | 2.80933 | 4.98071 | 1.03801  |
| Abcg1         | 2.8084  | 3.28497 | 3.74347  |
| Hp            | 2.80199 | 3.22152 | -3.51563 |
| Kit           | 2.7985  | 3.00238 | 3.27225  |
| Al451617      | 2.78435 | 3.08162 | 2.40068  |
| Tcf7          | 2.76786 | 3.47102 | 16.934   |
| Cd247         | 2.75498 | 3.61144 | 8.94038  |
| Sema7a        | 2.75301 | 4.40564 | 8.09443  |
| Oas3          | 2.74795 | 2.65328 | 1.25662  |
| Tubb3         | 2.74722 | 3.56189 | 4.01315  |
| Rnu3b1        | 2.74663 | 2.26233 | 2.2555   |
| Pira2         | 2.73934 | 4.0392  | -2.35096 |
| Tmem108       | 2.73377 | 3.4361  | -1.16962 |
| Irgb5         | 2.72127 | 3.25222 | -2.24297 |
| Cacnb3        | 2.71432 | 5.20222 | 1.8061   |
| Tmem35        | 2.70166 | 2.61846 | 1.05481  |
| Parp14        | 2.6887  | 2.73201 | 2.72297  |
| Adamts9       | 2.67264 | 3.71014 | 13.4575  |
| Lck           | 2.66596 | 2.83004 | 5.43781  |
| Oas1a         | 2.6582  | 2.52359 | -1.05972 |
| Tmtc2         | 2.65428 | 4.29331 | 7.83087  |
| Fn1           | 2.64929 | 5.28611 | 1.07509  |
| 3110052M02Rik | 2.64285 | 2.88044 | 2.16974  |
| Ppt1          | 2.63909 | 2.84207 | 3.36621  |
| Ar            | 2.63865 | 4.66322 | 3.20608  |
| Pld4          | 2.63526 | 3.07256 | 7.88576  |
| Gcom1         | 2.63394 | 3.72412 | 6.0015   |
| Bst1          | 2.62962 | 3.8517  | 1.81948  |
| Gas7          | 2.62897 | 3.27434 | 1.24217  |
| Tcra          | 2.6242  | 3.38281 | 3.15337  |
| Tcra          | 2.6242  | 3.38281 | 3.15337  |
| Slc22a23      | 2.62391 | 3.74705 | 2.56557  |
| Herc5         | 2.61287 | 2.75003 | 2.13316  |
| Rab44         | 2.61058 | 2.39395 | 1.54914  |
| Prkch         | 2.60943 | 3.12968 | 6.14559  |
| 9630013D21Rik | 2.60389 | 4.21738 | 1.99186  |
| Gm4955        | 2.60258 | 2.51047 | 1.8414   |
| Aqp11         | 2.58628 | 3.11332 | 9.35194  |
| Pla2g7        | 2.58404 | 4.15871 | -1.16994 |
| Selp          | 2.58041 | 2.84628 | -1.01285 |
| Cd2           | 2.57458 | 3.20197 | 5.49688  |
| Nrp2          | 2.5712  | 3.40144 | -1.0752  |
| 7120432I05Rik | 2.56355 | 2.89074 | 1.0967   |
| Ifit3         | 2.56258 | 2.39942 | 1.32021  |
| Lilrb3        | 2.55935 | 3.09303 | -1.33757 |
| Lgals3bp      | 2.5498  | 2.3828  | 1.56294  |



|                    |         |         |          |
|--------------------|---------|---------|----------|
| Tnfrsf18           | 2.54568 | 4.73889 | 3.61427  |
| Olfir524           | 2.53591 | 2.63958 | 5.35004  |
| Ahcyl2             | 2.52784 | 2.98385 | 4.08997  |
| Osm                | 2.51484 | 2.5997  | 2.71027  |
| Gldc               | 2.51126 | 3.97302 | 1.32391  |
| Sytl2              | 2.49191 | 3.47124 | 6.99711  |
| Tmem178            | 2.48354 | 2.80547 | -2.78067 |
| Flrt3              | 2.48016 | 2.63212 | -1.22686 |
| Tcra               | 2.47569 | 2.93211 | 2.46402  |
| Fndc1              | 2.47204 | 3.45732 | 1.24433  |
| Dgka               | 2.4714  | 3.42695 | 8.15334  |
| F630111L10Rik      | 2.46806 | 3.03509 | 1.19158  |
| Dusp1              | 2.46585 | 3.67892 | 2.53725  |
| Trf                | 2.45923 | 3.11267 | 1.95677  |
| Podxl              | 2.45798 | 3.39572 | 5.5446   |
| Socs3              | 2.45633 | 3.04242 | 3.22108  |
| Adamts9            | 2.44378 | 3.96151 | 15.3594  |
| Pld3               | 2.44099 | 2.98473 | 2.23635  |
| Cd300ld            | 2.43881 | 5.21666 | -1.12773 |
| Ms4a7              | 2.43369 | 2.7474  | 1.01425  |
| Cd80               | 2.4207  | 4.97268 | -3.1212  |
| Rps12              | 2.41628 | 2.84166 | 2.89344  |
| Ptplad2            | 2.41459 | 3.15027 | 1.04208  |
| OTTMUSG00000003606 | 2.41141 | 2.78801 | -1.1132  |
| Cmpk2              | 2.40968 | 2.30472 | 1.51885  |
| Wdr78              | 2.39407 | 2.41427 | 3.14536  |
| Inpp4b             | 2.3933  | 3.56508 | 3.73708  |
| Clec2d             | 2.37606 | 2.50288 | 2.91928  |
| Cytip              | 2.36658 | 2.83377 | 1.54369  |
| Bhlhe40            | 2.36473 | 3.48673 | 1.96818  |
| Gbp2               | 2.3644  | 3.4062  | 4.17193  |
| Cybb               | 2.36245 | 3.1716  | -7.68031 |
| Tspan7             | 2.35642 | 3.5855  | -1.1462  |
| Armcx4             | 2.35547 | 2.62818 | 2.49059  |
| Ctla2b             | 2.35316 | 2.40732 | 2.60199  |
| Lat                | 2.34741 | 2.52008 | 8.6574   |
| Ccr7               | 2.34565 | 3.83561 | 1.47222  |
| Cdkn2c             | 2.32916 | 3.04303 | 1.91609  |
| Cyp11a1            | 2.3286  | 2.53459 | -1.84663 |
| Lrp1               | 2.32827 | 2.94168 | -1.41066 |
| Fcgr2b             | 2.32765 | 2.46847 | -3.25898 |
| Zbp1               | 2.32529 | 2.6347  | 2.37828  |
| Cd33               | 2.31992 | 2.4125  | -2.13977 |
| Glp1r              | 2.31349 | 7.83457 | 26.2717  |
| 9430008C03Rik      | 2.30257 | 2.21707 | 1.532    |
| OTTMUSG00000003606 | 2.30169 | 2.68281 | -1.13555 |
| Sifn2              | 2.28765 | 2.78406 | 2.02867  |
| Lrrc6              | 2.28496 | 2.65869 | -1.21047 |
| Tnfsf11            | 2.28488 | 2.8348  | 5.08707  |
| Slc15a1            | 2.28364 | 2.64683 | 5.29893  |
| Ctla2a             | 2.28118 | 3.4063  | 2.9915   |
| Rnf217             | 2.26141 | 2.68136 | -1.61253 |

|               |         |         |          |
|---------------|---------|---------|----------|
| Vegfa         | 2.25941 | 2.61397 | 1.62898  |
| Ikzf2         | 2.2581  | 2.68489 | 3.14991  |
| C1qb          | 2.23631 | 3.05801 | -1.80513 |
| Skap1         | 2.23626 | 2.51664 | 3.07894  |
| Gab2          | 2.23244 | 2.48448 | 2.16734  |
| Sdc1          | 2.22611 | 2.10609 | -1.13056 |
| Nrg1          | 2.22557 | 2.93118 | 1.10937  |
| Igfbp4        | 2.22126 | 2.40642 | 1.97153  |
| Sirpb1        | 2.20868 | 2.70303 | -1.23064 |
| Ttc39c        | 2.19483 | 2.70732 | -1.28485 |
| Phf11         | 2.19255 | 2.23748 | 1.54078  |
| Nr4a3         | 2.1913  | 4.38594 | 1.06497  |
| EG435337      | 2.17965 | 2.41573 | 1.08976  |
| Cd200r1       | 2.171   | 2.60659 | 1.09681  |
| Chdh          | 2.16753 | 2.527   | 4.46084  |
| Raver2        | 2.166   | 2.73904 | 1.39596  |
| Arhgap26      | 2.16389 | 2.46685 | 3.29386  |
| Pira11        | 2.15813 | 2.96505 | -1.91786 |
| Mpp1          | 2.1544  | 2.58734 | 4.8107   |
| Adamts9       | 2.15162 | 3.13847 | 11.6705  |
| Cd80          | 2.14416 | 4.31747 | -1.38559 |
| Sirpb1        | 2.1317  | 2.39163 | -1.22972 |
| Itgb2         | 2.12998 | 2.62116 | 1.9461   |
| Sytl3         | 2.12972 | 3.23218 | 17.3119  |
| Dpysl2        | 2.12362 | 2.19926 | 2.29924  |
| Padi2         | 2.12247 | 2.91839 | 1.89634  |
| Pigz          | 2.11978 | 2.34099 | 1.27114  |
| Angptl2       | 2.11703 | 2.37334 | 3.28362  |
| Tmem120b      | 2.11675 | 2.84665 | 1.97575  |
| Mmp19         | 2.113   | 2.79529 | -1.62937 |
| Soat1         | 2.10884 | 2.0523  | 2.26021  |
| Hif1a         | 2.10412 | 2.08257 | 1.04897  |
| Tlr1          | 2.10145 | 2.683   | 1.6812   |
| Rps6ka2       | 2.09612 | 2.23815 | -1.00769 |
| Irf9          | 2.09586 | 2.02256 | 1.66026  |
| Hsd11b1       | 2.09524 | 2.62652 | 4.81936  |
| Gzmc          | 2.09142 | 4.35551 | 1.22175  |
| Neto2         | 2.07912 | 3.01635 | 1.20022  |
| Ppic          | 2.07751 | 2.25499 | 2.10069  |
| Mx2           | 2.07659 | 2.07788 | 1.14853  |
| Tns1          | 2.07556 | 2.63221 | 1.86787  |
| Dab2          | 2.06941 | 2.60387 | -3.26226 |
| Grn           | 2.06936 | 2.14488 | 1.2533   |
| Il12rb2       | 2.06759 | 2.91462 | 1.20628  |
| Pml           | 2.06701 | 2.18501 | 2.59997  |
| Il1b          | 2.06505 | 3.34646 | 1.03578  |
| Maoa          | 2.06461 | 2.72903 | 1.34207  |
| 1190002H23Rik | 2.05259 | 2.41921 | 2.8719   |
| Sell          | 2.04893 | 2.17914 | 2.43976  |
| Pgm2          | 2.04813 | 2.36044 | 2.18478  |
| 5830443L24Rik | 2.04654 | 2.25619 | 4.31877  |
| Casp4         | 2.04181 | 2.16169 | 1.81916  |

|               |          |          |          |
|---------------|----------|----------|----------|
| Tgfb2         | 2.03685  | 3.12251  | 3.60665  |
| Itgb3         | 2.03575  | 2.39126  | 4.97243  |
| Atp11a        | 2.03244  | 2.37311  | -2.22166 |
| Mgst1         | 2.02468  | 2.48631  | -1.50273 |
| Utrn          | 2.024    | 2.56757  | 4.71905  |
| Socs1         | 2.02063  | 2.44114  | 2.86879  |
| Fam102a       | 2.0188   | 2.58775  | 2.8841   |
| Adamts17      | 2.01348  | 2.5051   | 1.9104   |
| Slc9a9        | 2.00397  | 2.38152  | 4.25096  |
| Sfrp2         | 2.00114  | 2.61137  | 1.75852  |
| Eld1          | -22.9764 | -16.549  | -27.7951 |
| Gem           | -15.8696 | -10.7717 | -18.5536 |
| Car2          | -15.0698 | -10.2726 | -5.41411 |
| Il1r1         | -13.8649 | -8.83852 | -20.5475 |
| Ngp           | -12.8117 | -13.7897 | -14.044  |
| Scin          | -10.0228 | -5.21038 | 1.11904  |
| 9030619P08Rik | -9.62608 | -9.73486 | -5.19994 |
| Angpt1        | -9.25465 | -7.59781 | 1.06172  |
| Havcr2        | -8.77255 | -4.81726 | -4.07701 |
| Spint1        | -8.12629 | -7.07769 | -8.73565 |
| Kmo           | -7.93663 | -6.59275 | -11.8556 |
| Ccnd1         | -7.25722 | -5.93082 | -8.62119 |
| Ctr9          | -6.99367 | -5.43232 | -6.96698 |
| Mn1           | -6.84299 | -5.85423 | -6.00663 |
| Nrp1          | -6.54266 | -6.87954 | 1.02283  |
| Ela2          | -6.50869 | -5.10979 | -18.2404 |
| Gca           | -6.50228 | -4.68177 | -6.97906 |
| P2rx3         | -6.44161 | -5.80453 | -7.99622 |
| Slc7a3        | -6.41689 | -4.86898 | -3.62658 |
| B3gnt5        | -6.37376 | -5.20535 | -3.29899 |
| Ly86          | -6.25905 | -3.76832 | -14.6865 |
| Gcet2         | -6.17736 | -6.12654 | -7.36081 |
| Mctp2         | -5.99947 | -5.83867 | -1.40131 |
| Ica1          | -5.97299 | -4.87768 | -12.9424 |
| Cd79b         | -5.8064  | -4.72267 | -1.81491 |
| Gm10759       | -5.7678  | -5.50624 | -7.12133 |
| Tmem119       | -5.5754  | -5.23616 | -6.18145 |
| Mcpt8         | -5.33034 | -4.58927 | -1.38813 |
| Cd96          | -5.2597  | -3.51257 | -9.94218 |
| Dusp6         | -5.25522 | -5.09607 | -2.04294 |
| Gatm          | -5.24027 | -3.92614 | -18.1972 |
| Chad          | -5.23925 | -5.30178 | -2.5267  |
| Slco3a1       | -5.1331  | -4.46489 | -1.26163 |
| Vldlr         | -4.92129 | -5.04334 | -5.55231 |
| Stau2         | -4.68021 | -3.89139 | -4.08542 |
| Gapt          | -4.6628  | -4.18121 | -21.1742 |
| Ociad2        | -4.59669 | -3.87991 | -4.53921 |
| Lmo2          | -4.59667 | -4.0181  | -8.87691 |
| Irf8          | -4.56299 | -4.37611 | -6.5712  |
| Itih5         | -4.4706  | -3.2061  | 1.53524  |
| Lax1          | -4.41638 | -4.38696 | 1.01314  |
| Gcnt2         | -4.24673 | -3.66277 | -6.19734 |

|           |          |          |          |
|-----------|----------|----------|----------|
| Il18rap   | -4.23046 | -3.31314 | -2.11952 |
| Ctse      | -4.15264 | -2.08912 | 2.05945  |
| Etv5      | -4.13064 | -2.9047  | -1.53263 |
| Bex6      | -4.11078 | -2.20867 | -4.64853 |
| Tnfrsf13c | -4.08414 | -3.72487 | -4.12606 |
| As3mt     | -4.00989 | -4.10349 | -4.18491 |
| Rgs1      | -3.9685  | -2.07056 | -1.84249 |
| Cdh17     | -3.94059 | -4.27798 | -4.10438 |
| Gjb3      | -3.85075 | -3.68143 | -3.36635 |
| Mtss1     | -3.84501 | -2.60776 | -1.80942 |
| Dhrs3     | -3.84111 | -3.8264  | -1.80464 |
| Dmxl2     | -3.80244 | -3.19718 | -5.15479 |
| Ctnnd2    | -3.78921 | -3.11959 | -4.7023  |
| Clnk      | -3.77363 | -2.92093 | -4.16011 |
| Enam      | -3.75929 | -4.48151 | -4.34622 |
| Abcb1b    | -3.74209 | -3.5026  | -6.68359 |
| Gimap6    | -3.73666 | -2.62114 | 2.08393  |
| Ccdc135   | -3.69517 | -3.30903 | 1.48684  |
| Etv5      | -3.68619 | -3.35519 | -1.65464 |
| Mef2c     | -3.63747 | -3.69193 | -16.2543 |
| Rnase6    | -3.6311  | -2.74826 | -3.38474 |
| Endod1    | -3.59897 | -3.17572 | -1.78752 |
| Eng       | -3.57927 | -3.14449 | -2.76293 |
| Cd28      | -3.56383 | -2.31162 | -1.36665 |
| Reep6     | -3.56251 | -3.18968 | -3.47988 |
| Aldh1l2   | -3.52068 | -2.96543 | -6.16953 |
| Arap2     | -3.49241 | -2.04032 | -1.0922  |
| Cth       | -3.47918 | -3.87157 | -5.64442 |
| Gm14005   | -3.45878 | -2.90911 | -4.9562  |
| Tbxas1    | -3.45635 | -3.64561 | -3.59535 |
| Ptgs1     | -3.45524 | -2.81384 | -3.3679  |
| Hpgds     | -3.4465  | -2.7336  | -2.45812 |
| Rnf141    | -3.36482 | -2.50775 | -3.86436 |
| Il1rl2    | -3.35409 | -3.24307 | -1.79612 |
| Freq      | -3.30662 | -2.21751 | -4.70611 |
| St3gal5   | -3.29532 | -2.42743 | -2.33915 |
| Cd300c    | -3.28524 | -2.88462 | -3.80494 |
| Nos1ap    | -3.25637 | -3.19264 | -5.29064 |
| Car1      | -3.24057 | -3.46657 | -3.79614 |
| Rnf141    | -3.22314 | -3.08287 | -4.44614 |
| Adamts3   | -3.19572 | -2.33098 | 2.39393  |
| Alcam     | -3.18341 | -2.30849 | -3.53906 |
| Trem3     | -3.18303 | -2.65477 | -9.50105 |
| Ttpa      | -3.15576 | -2.52688 | -2.82279 |
| Khdrbs3   | -3.15538 | -2.66313 | -3.79078 |
| Eomes     | -3.15433 | -2.84249 | -3.99287 |
| Wwc2      | -3.14986 | -2.51645 | -2.65519 |
| Elovl7    | -3.13961 | -3.99645 | -3.44777 |
| Tnfrsf10b | -3.13611 | -2.55724 | -3.1209  |
| Rhobtb3   | -3.13066 | -2.5144  | -2.66067 |
| Map4k5    | -3.12595 | -2.33849 | -7.26474 |
| AI747699  | -3.11626 | -2.30268 | -4.16657 |

|               |          |          |          |
|---------------|----------|----------|----------|
| Hpse          | -3.09239 | -3.05895 | -2.65227 |
| Ppp2r5c       | -3.07913 | -2.66575 | -2.94178 |
| Fmnl2         | -3.06013 | -2.5278  | 2.64353  |
| Slc25a12      | -3.05852 | -2.17354 | -1.79452 |
| Ttpa          | -3.05655 | -3.10218 | -2.4944  |
| Hist2h3c2     | -3.05006 | -2.89553 | -1.79297 |
| Cd180         | -3.04738 | -2.21009 | -9.70304 |
| Gcnt1         | -3.04326 | -2.36856 | -3.81737 |
| Pycr1         | -3.01456 | -2.62363 | -3.76388 |
| Lat2          | -3.01065 | -2.71517 | -1.90048 |
| Ncf1          | -3.00679 | -2.39271 | -7.82036 |
| Zfp111        | -3.00597 | -2.5174  | -4.11965 |
| EG668725      | -2.99877 | -2.203   | -3.8484  |
| Bcl11a        | -2.99062 | -2.57149 | -5.3496  |
| Slc14a1       | -2.98672 | -2.23222 | 2.36665  |
| Slc7a11       | -2.97918 | -2.85393 | -4.09816 |
| Ptger3        | -2.93257 | -3.28815 | -2.56727 |
| Hlf           | -2.91404 | -3.06227 | -3.58412 |
| Fmnl3         | -2.90735 | -2.17705 | 1.09454  |
| Adamts3       | -2.89844 | -2.14201 | 1.76601  |
| Ptp4a3        | -2.89151 | -2.75511 | -1.6058  |
| Cd5           | -2.87597 | -2.68734 | -1.39686 |
| Frm4b         | -2.83584 | -2.2674  | -2.61887 |
| Mpeg1         | -2.83262 | -2.47305 | -27.948  |
| Itga1         | -2.82851 | -2.3219  | -4.84402 |
| Rnf122        | -2.80054 | -2.28414 | -1.73359 |
| Cybasc3       | -2.79134 | -2.46935 | -2.30818 |
| Ly6d          | -2.78845 | -2.30935 | 4.8948   |
| Slc9a7        | -2.77314 | -2.05624 | -2.09647 |
| Tifab         | -2.77047 | -2.22333 | -8.31701 |
| Gfi1b         | -2.75987 | -2.35573 | -3.12904 |
| Prkce         | -2.75687 | -2.83787 | -1.87411 |
| Phlda3        | -2.74183 | -2.20357 | -2.66038 |
| Stap1         | -2.74157 | -2.46326 | -1.4477  |
| Adc           | -2.72688 | -2.25207 | -2.6314  |
| Ppp2r5c       | -2.71959 | -2.59887 | -2.62668 |
| Myl4          | -2.71132 | -2.74636 | 1.40395  |
|               | -2.70973 | -2.64579 | -2.16378 |
| Cldn12        | -2.70709 | -2.51881 | -2.23591 |
| Il21r         | -2.69951 | -2.30324 | -2.13947 |
| Chn2          | -2.68912 | -2.63876 | -1.27931 |
| Atp2b4        | -2.68845 | -2.03103 | -1.93488 |
| Gtlf3a        | -2.68504 | -2.05468 | -2.62224 |
| AY512938      | -2.67329 | -2.00539 | -3.8029  |
| Tet1          | -2.66904 | -2.0499  | -3.74064 |
| Slc2a3        | -2.66753 | -2.22851 | -1.78188 |
| Mpp6          | -2.66092 | -2.42796 | -3.20545 |
| Il12a         | -2.65931 | -2.35042 | -8.06814 |
| Cd244         | -2.64061 | -2.08854 | -1.83998 |
| Slc1a4        | -2.62903 | -2.25252 | -2.89647 |
| Tpcn1         | -2.62521 | -2.04259 | -1.00642 |
| 4632434111Rik | -2.59648 | -2.28398 | -3.99785 |

|               |          |          |          |
|---------------|----------|----------|----------|
| Sdr39u1       | -2.58194 | -2.00131 | -1.69182 |
| Nucb2         | -2.57662 | -2.28293 | -3.04431 |
| Hbb-b1        | -2.5602  | -2.11759 | 1.5637   |
| Spns2         | -2.55629 | -2.4746  | -1.26595 |
| Rasgrp2       | -2.54754 | -2.19521 | 1.06949  |
| Mansc1        | -2.54631 | -2.37535 | -2.33869 |
| Afap111       | -2.52469 | -2.15397 | -1.56508 |
| Sypl          | -2.51859 | -2.3583  | -1.31649 |
| Ear2          | -2.49569 | -2.92504 | -4.44764 |
| Xlr           | -2.49399 | -2.07904 | 1.36081  |
| Pla2g4a       | -2.46737 | -2.33143 | -3.0182  |
| 6330442E10Rik | -2.45528 | -2.20305 | -1.83388 |
| Tox3          | -2.4548  | -2.18716 | -1.32199 |
| Tmem74        | -2.45469 | -2.23676 | -2.35782 |
| Abcg2         | -2.44694 | -2.16996 | -2.1362  |
| Adamts3       | -2.39972 | -2.17619 | 1.88526  |
| Mtap7d3       | -2.39671 | -2.38899 | -3.38981 |
| Dtx4          | -2.39635 | -2.09732 | -2.66278 |
| Tbxa2r        | -2.38262 | -2.61988 | 1.65776  |
| Rnf144b       | -2.3769  | -2.19418 | -1.89628 |
| Lphn2         | -2.36277 | -2.13425 | -2.07239 |
| Gm14636       | -2.35898 | -2.44458 | -2.33529 |
| Agpat2        | -2.34989 | -2.03637 | -1.42651 |
| 2210411K11Rik | -2.33616 | -2.10374 | -2.66884 |
| Egfl7         | -2.32044 | -2.34124 | -2.56469 |
| Cox6a2        | -2.31998 | -2.60142 | -7.51448 |
| Gstm5         | -2.30962 | -2.45977 | -2.75549 |
| Chac1         | -2.30493 | -2.24616 | -2.58985 |
| Bmyc          | -2.30408 | -2.03438 | -3.63447 |
| Slc6a9        | -2.29084 | -2.20089 | -1.59005 |
| Ermp1         | -2.27769 | -2.24468 | -2.18041 |
| Dmxl2         | -2.26424 | -2.14848 | -2.55669 |
| Msrb3         | -2.2464  | -2.24847 | -2.72517 |
| Dlk1          | -2.23043 | -2.27512 | -1.6005  |
| Jam2          | -2.22996 | -2.12628 | -2.27274 |
| Aqp9          | -2.22371 | -2.00845 | -2.6499  |
| Fam69a        | -2.20936 | -2.00531 | -1.70138 |
| Pecr          | -2.20797 | -2.02732 | -2.1963  |
| Igj           | -2.19769 | -2.35483 | -1.22972 |
| Tspan6        | -2.19192 | -2.1279  | -2.56323 |
| Stc2          | -2.18712 | -2.14602 | -1.81667 |
| Gm4989        | -2.18422 | -2.26545 | -1.34541 |
| Asns          | -2.17183 | -2.18641 | -3.47034 |
| Coq3          | -2.13843 | -2.06335 | -2.365   |
| Ctsg          | -2.12152 | -2.4833  | -3.10383 |
| Ifrd1         | -2.10407 | -2.04786 | -2.13253 |
| Cops4         | -2.08808 | -2.02481 | -2.03318 |
| Rhobtb1       | -2.05878 | -2.00695 | -1.9559  |
| Mc5r          | -2.02504 | -2.13656 | -1.71937 |
| Rab38         | -2.00869 | -2.32875 | -1.67399 |
| Mina          | -2.00379 | -2.07873 | -2.65885 |
